# Supplementary material
Source: PubMed Central journal article supplement (PMC2688841)
Supplement: 0902973106_0902973106SI.pdf [file 0902973106_0902973106SI.pdf]

# Supporting Information

Jablonski and Finarelli 10.1073/pnas.0902973106

## SI Text

**Hypothesis Testing of Monophyly and Polyphyly.** We calculated the proportions of monophyly, paraphyly, and polyphyly, and we calculated confidence intervals around these proportions as 2 standard errors of the estimate, using Wilson's method (1):

$$SE = \sqrt{\frac{p^*(1-p^*)}{n+4}},$$

with

$$p^* = \frac{a+2}{n+4}.$$

In this equation,  $a$  is the number of "positive" counts (that is, for monophyly,  $a$  is the number of monophyletic morphogenera), and  $n$  is the total count of sampled morphogenera. We performed these calculations on the total set of surveyed morphogenera and for Mollusca and Mammalia separately. We also considered the molluscan clades Gastropoda and Bivalvia individually and further partitioned Mollusca, Gastropoda, and Bivalvia into marine and nonmarine groups, because the principal nonmarine taxa of both gastropods (Pulmonata) and bivalves (Unionoida) have been notoriously difficult to resolve morphologically.

We then quantitatively assessed the rate of monophyly for morphogenera in each data partition to determine if the observed rate significantly exceeds what would be expected by chance. Such a determination requires a model of taxonomic accuracy to set the proportion of monophyletic morphogenera that one would expect to observe by chance assuming that there is no association between taxonomic assignment to a genus and true phylogenetic relatedness. Unfortunately, what constitutes an appropriate model is not straightforward. Here, we present 3 potential models, and we obtained consistent results in applying all 3.

**Model 1: Random Permutation Model.** The simplest approach is a permutation model, assessing the frequency of monophyletic genera that would occur from a random draw of cladograms. Here, the expected rate is the ratio of the number of cladograms consistent with a monophyletic morphogenus to the total number of potential cladograms. This model effectively postulates that there is no phylogenetic information in generic assignment according to morphology-based taxonomy, and any congruence between genera and phylogeny is happenstance. The probability in this model varies as a function of both the total number of species in the analysis and the number of species in the morphogenus. Given the rules we followed for selection of phylogenetic analyses (see *Methods*), the maximum chance probability under this model is realized at the minimum requirement for inclusion in our analysis: a morphogenus of 3 species and a total of 5 species in the phylogenetic analysis. For this case, there are 105 potential cladogram topologies for the 5 species, of which 9

recover the morphogenus as a monophyletic clade ( $P = 8.6\%$ ). If the analysis instead includes a total of 6 species, then the total number of potential cladograms is 945, 45 of which are consistent with monophyly for the same 3-species genus ( $P = 4.7\%$ ). Given the observed distribution of species in the surveyed phylogenetic analyses (Table S1), the median probability of observing monophyly by a random selection of cladogram topologies is  $9.5 \text{ E-}05$ , ranging from  $3.0 \text{ E-}33$  to  $4.7\%$ . These values are similar in mammals (range:  $3.0 \text{ E-}33$  to  $4.7\%$ , median:  $1.8 \text{ E-}04$ ) and mollusks (range:  $1.4 \text{ E-}32$  to  $3.0\%$ , median:  $1.5 \text{ E-}05$ ). Thus, under model 1, the expected probability of morphogenus monophyly ranges from low to minuscule. Moreover, the observed frequency of monophyly significantly exceeds the highest probability under this model ( $4.7\%$ ) for every examined data partition.

**Model 2: Unbiased Genus Assignment.** It is not certain that the above "balls in an urn"-type model is appropriate for testing whether the observed rate of monophyly is greater than expected by chance. An alternative could assume that there is an equal probability for correct or incorrect assignment of a genus name to a given species. This model treats correct generic assignment by the taxonomist as an unbiased coin flip, with a 50–50 probability, such that the joint probability of correctly assigning the same name to  $n$  species forming a monophyletic clade with respect to a molecular phylogeny would be  $(\frac{1}{2})^n$ . With our minimum requirement for inclusion being 3 species in a morphogenus, the maximum probability under this model is therefore  $12.5\%$ , and diminishes as the number of taxa in the genus increases. Given the observed number of species in surveyed morphogenera (Table S1), the median probability of monophyly is  $6.25\%$ , with a range of  $6.9 \text{ E-}18$  to  $12.5\%$ . Again, the ranges and medians are similar for mammals (range:  $7.9 \text{ E-}12$  to  $12.5\%$  median:  $6.25\%$ ) and mollusks (range:  $6.9 \text{ E-}18$  to  $12.5\%$ , median:  $3.13\%$ ). Here, too, the observed frequencies of monophyly for our compilation are significantly greater than even the highest probability under this model for all data partitions.

**Model 3: Equiprobable Phyletic States.** One could also assign equal probabilities to each of the 4 phyletic states illustrated in Fig. 1 (monophyly, uniparaphyly, multiparaphyly, and polyphyly). This model treats a named morphogenus as an arbitrary collection of taxa, and this set of taxa could exhibit any of the potential phyletic states when actually subjected to a phylogenetic analysis. This is certainly not a realistic scenario; however, this assumption gives an expected proportion  $25\%$  that is always greater than the probability of monophyly based on either the "random draw" or "coin-flip" models. As there is no definitively correct model, we treat this value of  $25\%$  as a highly conservative overestimate of the true expected rate of monophyly. By transitivity, if an observed rate of monophyly is significantly  $>25\%$ , then morphogenera are significantly more congruent with the results of molecular analyses than would be expected by chance if there is no phylogenetic information contained in morphological taxonomies.

1. Wilson EB (1927) Probable inference, the law of succession, and statistical inference. *J Am Stat Assoc* 22:209–212.
2. Alexander LF, Riddle BR (2005) Phylogenetics of the new world rodent family heteromyidae. *J Mamm* 86:366–379.
3. Anderson FE (2000) Phylogeny and historical biogeography of the loliginid squids (Mollusca: Cephalopoda) based on mitochondrial DNA sequence data. *Mol Phy Evol* 15:191–214.

4. Armbruster GFJ, Bohme M, Bernhard D, Schlegel M (2005) The H3/H4 histone gene cluster of land snails (Gastropoda: Stylommatophora): TS/TV ratio, GC3 drive, and signals in stylommatophoran phylogeny. *J Moll Stud* 71:339–348.
5. Arnason U, Gullberg A Janke G, Kullberg M (2007) Mitogenomic analyses of caniform relationships. *Mol Phy Evol* 45:863–874.

6. Baker AM, Sheldon F, Somerville J, Walker KF, Hughes JM (2004) Mitochondrial DNA phylogenetic structuring suggests similarity between two morphologically plastic genera of Australian freshwater mussels (Unionoidea: Hyriidae). *Mol Phy Evol* 32:902–912.
7. Bardeleben C, Moore RL, Wayne RK (2005) A molecular phylogeny of the Canidae based on six nuclear loci. *Mol Phy Evol* 37:815–831.
8. Barros MC, Sampaio I, Schneider H (2003) Phylogenetic analysis of 16S mitochondrial DNA data in sloths and anteaters. *Gene Mol Biol* 26:5–11.
9. Barroso CML, et al. (1997) Update on the phylogenetic systematics of new world monkeys: Further DNA evidence for placing the pygmy marmoset (*Cebuella*) within the genus *Callithrix*. *Int J Primatol* 18:651–674.
10. Birungi J, Arctander P (2001) Molecular systematics and phylogeny of the Reduncini (Artiodactyla: Bovidae) inferred from the analysis mitochondrial cytochrome *b* gene sequences. *J Mamm Evol* 8:125–147.
11. Blacket MJ, et al. (1999) Systematic relationships within the dasyurid marsupial tribe Sminthopsini: A multigenic approach. *Mol Phy Evol* 12:140–155.
12. Bradley RD, Edwards CW, Carroll DS, Kilpatrick CW (2004) Phylogenetic relationships of neotomineperomyscine rodents: Based on DNA sequences from the mitochondrial cytochrome *b* gene. *J Mamm* 85:389–395.
13. Campbell DC, et al. (2005) Phylogeny of North American amblemines (Bivalvia, Unionoidea): Prodigious polyphyly proves pervasive across genera. *Invert Biol* 124:131–164.
14. Canapa A, Barucca M, Marinelli A, Olmo E (2001) A molecular phylogeny of Heterodonta (Bivalvia) based on small ribosomal subunit RNA sequences. *Mol Phy Evol* 21:156–161.
15. Canavez FC, Moreira MAM, Simon F, Parham P, Seuanez HN (1999) Phylogenetic relationships of the callitrichinae (Platyrrhini, primates) based on  $\beta^2$ -microglobulin DNA sequences. *Am J Primatol* 48:225–236.
16. Carlini DB, Young RE, Vecchione M (2001) A molecular phylogeny of the octopoda (Mollusca: Cephalopoda) evaluated in light of morphological evidence. *Mol Phy Evol* 21:388–397.
17. Chaves R, et al. (1999) The place of *Callimico goeldii* in the callitrichine phylogenetic tree: Evidence from von Willebrand factor gene intron II sequences. *Mol Phy Evol* 13:392–404.
18. Chevret P, Dobigny G (2005) Systematics and evolution of the subfamily Gerbillinae (Mammalia, Rodentia, Muridae). *Mol Phy Evol* 35:674–688.
19. Chevret P, Veyrunes F, Britton-Davidian J (2005) Molecular phylogeny of the genus *Mus* (Rodentia: Murinae) based on mitochondrial and nuclear data. *Biol J Linn Soc* 84:417–427.
20. Collin R (2005) Development, phylogeny, and taxonomy of *Bostrycapulus* (Caenogastropoda: Calyptraeidae), an ancient cryptic radiation. *Zool J Linn Soc* 144:75–101.
21. Collins AC (2004) Atelinae phylogenetic relationships: The trichotomy revived? *Am J Phys Anthropol* 124:285–296.
22. Cook JA, Runck AM, Conroy CJ (2004) Historical biogeography at the crossroads of the northern continents: Molecular phylogenetics of red-backed voles (Rodentia: Arvicolinae). *Mol Phy Evol* 30:767–777.
23. Cronin MA, Stuart R, Pierson BJ, Patton JC (1996) K-casein gene phylogeny of higher ruminants (Pecora, Artiodactyla). *Mol Phy Evol* 6:295–311.
24. Davenport TRB, et al. (2006) A new genus of African monkey, *Rungwecebus*: Morphology, ecology, and molecular phylogenetics *Science* 312:1378–1381.
25. de Weerd DRU, Gittenberger E (2004) Re-evaluating *Carinigera*: Molecular data overturn the current classification within the clausiliid subfamily Aloiinae (Gastropoda, Pulmonata). *J Moll Stud* 70:305–318.
26. Delisle I, Strobeck C (2005) A phylogeny of the Caniformia (order Carnivora) based on 12 complete protein-coding mitochondrial genes. *Mol Phy Evol* 37:192–201.
27. DelPero M, et al. (2001) Phylogenetic relationships among the Malagasy lemuriforms (Primates: Strepsirrhini) as indicated by mitochondrial sequence data from the 12S rRNA gene. *Zool J Linn Soc* 133:83–103.
28. DelPero M, Pozzi L, Masters JC (2006) A composite molecular phylogeny of living lemuroid primates. *Folia Primatol* 77:434–445.
29. Distel DL (2000) Phylogenetic relationships among Mytilidae (Bivalvia): 18S rRNA data suggest convergence in mytilid body plans. *Mol Phy Evol* 15:25–33.
30. Donald KM, Kennedy M, Spencer HG (2005) The phylogeny and taxonomy of austral monodontine topshells (Mollusca: Gastropoda: Trochidae), inferred from DNA sequences. *Mol Phy Evol* 37:474–483.
31. Dragoo JW, Honeycutt RL (1997) Systematics of mustelid-like carnivores. *J Mamm* 78:426–443.
32. Dubey S, Salamin N, Ohdachi SD, Barriere P, Vogel P (2007) Molecular phylogenetics of shrews (Mammalia: Soricidae) reveal timing of transcontinental colonizations. *Mol Phy Evol* 44:126–137.
33. Dufour SC, Steiner G, Beninger PG (2006) Phylogenetic analysis of the perihydrothermal vent bivalve *Bathypecten vulcani* based on 18s rRNA. *Malacologia* 48:35–42.
34. Dutra-Clarke AVC, Williams C, Dickstein R, Kaufer N, Spotila JR (2001) Inferences on the phylogenetic relationships of Succineidae (Mollusca, Pulmonata) based on 18S rRNA gene. *Malacologia* 43:223–236.
35. Emerson GL, Kilpatrick CW, McNiff BE, Ottenwalder J, Allard MW (1999) Phylogenetic relationships of the order insectivora based on complete 12S rRNA sequences from mitochondria. *Cladistics* 15:221–230.
36. Engel SR, Hogan KM, Taylor JF, Davis SK (1998) Molecular systematics and paleobiogeography of the South American sigmodontine rodents. *Mol Biol Evol* 15:35–49.
37. Faulkes CG, Verheyen E, Verheyen W, Jarvis JUM, Bennett NC (2004) Phylogeographical patterns of genetic divergence and speciation in African mole-rats (Family: Bathyergidae). *Mol Ecol* 13:613–629.
38. Flynn JJ, Finarelli JA, Zehr S, Hsu J, Nedbal MA (2005) Molecular phylogeny of the Carnivora (Mammalia): Assessing the impact of increased sampling on resolving enigmatic relationships. *Syst Biol* 54:317–337.
39. Fulton TL, Strobeck C (2006) Molecular phylogeny of the Arctoidea (Carnivora): Effect of missing data on supertree and supermatrix analyses of multiple gene datasets. *Mol Phy Evol* 41:165–181.
40. Galewski T, Mauffrey JF, Leite YLR, Patton JL, Douzery EJP (2005) Ecomorphological diversification among South American spiny rats (Rodentia: Echimyidae): A phylogenetic and chronological approach. *Mol Phy Evol* 34:601–615.
41. Gallardo MH, et al. (2004) Whole-genome duplications in South American desert rodents (Octodontidae). *Biol J Linn Soc* 82:443–451.
42. Gatesy J, Yelon D, Desalle R, Vrba ES (1992) Phylogeny of the Bovidae (Artiodactyla, Mammalia) based on mitochondrial ribosomal DNA sequences. *Mol Biol Evol* 9:433–446.
43. Gaubert P, Veron G (2003) Exhaustive sample set among Viverridae reveals the sister-group of felids: The linsangs as a case of extreme morphological convergence within Feliformia. *Proc R Soc London Ser B* 270:2523–2530.
44. Gaubert P, Cordeiro-Estrela P (2006) Phylogenetic systematics and tempo of evolution of the Viverrinae (Mammalia, Carnivora, Viverridae) within feliformians: Implications for faunal exchanges between Asia and Africa. *Mol Phy Evol* 41:266–278.
45. Gilbert C, Ropiquet A, Hassanin A (2006) Mitochondrial and nuclear phylogenies of Cervidae (Mammalia, Ruminantia): Systematics, morphology, and biogeography. *Mol Phy Evol* 40:101–117.
46. Glaubrecht M, von Rintelen T (2003) Systematics, molecular genetics, and historical zoogeography of the viviparous freshwater gastropod *Pseudopotamis* (Cerithioidea, Pachychilidae): A relic on the Torres Strait Islands, Australia. *Zool Scr* 32:415–435.
47. Goodacre SL, Wade CM (2001) Molecular evolutionary relationships between partiid land snails of the Pacific. *Proc R Soc London Ser B* 268:1–7.
48. Haase M (2005) Rapid and convergent evolution of parental care in hydrobiid gastropods from New Zealand. *J Evol Biol* 18:1076–1086.
49. Halanyc KM, Robinson TJ (1999) Multiple substitutions affect the phylogenetic utility of cytochrome *b* and 12S rDNA data: Examining a rapid radiation in Leporidae (Lagomorpha) evolution. *J Mol Evol* 48:369–379.
50. Harper EM, Dreyer H, Steiner G (2006) Reconstructing the Anomalodesmata (Mollusca: Bivalvia): Morphology and molecules. *Zool J Linn Soc* 148:395–420.
51. Hassanin A, Ropiquet A (2004) Molecular phylogeny of the tribe Bovini (Bovidae, Bovinae) and the taxonomic status of the Kouprey, *Bos sauveli* Urbain 1937. *Mol Phy Evol* 33:896–907.
52. Hassanin A, Douzery EJP (1999) Evolutionary affinities of the enigmatic saola (*Pseudoryx nghetinhensis*) in the context of the molecular phylogeny of Bovidae. *Proc R Soc London Ser B* 266:893–900.
53. Hassanin A, Douzery EJP (1999) The tribal radiation of the family Bovidae (Artiodactyla) and the evolution of the mitochondrial cytochrome *b* gene. *Mol Phy Evol* 13:227–243.
54. Hassanin A, Pasquet E, Vigne JD (1998) Molecular systematics of the subfamily caprinae (Artiodactyla, Bovidae) as determined from cytochrome *b* sequences. *J Mamm Evol* 5:217–236.
55. Heralde FM, et al. (2007) Molecular phylogeny of some Indo-Pacific genera in the subfamily Turrinae H. Adams and A. Adams, 1853 (1838) (Gastropoda: Neogastropoda). *Nautilus* 121:131–138.
56. Herron MD, Castoe TA, Parkinson CL (2004) Sciurid phylogeny and the paraphyly of Holarctic ground squirrels (*Spermophilus*). *Mol Phy Evol* 31:1015–1030.
57. Holland BS, Hadfield MG (2004) Origin and diversification of the endemic Hawaiian tree snails (Achatinellidae: Achatinellinae) based on molecular evidence. *Mol Phy Evol* 32:588–600.
58. Holznagel WE, Lydeard C (2000) A molecular phylogeny of North American Pleuroceridae (Gastropoda: Cerithioidea) based on mitochondrial 16S rDNA sequences. *J Moll Stud* 66:233–257.
59. Honeycutt RL, Rowe DL, Gallardo MH (2003) Molecular systematics of the South American caviomorph rodents: Relationships among species and genera in the family Octodontidae. *Mol Phy Evol* 26:476–489.
60. Horvath JE, et al. (2008) Development and application of a phylogenomic toolkit: Resolving the evolutionary history of Madagascar's lemurs. *Gen Res* 18:489–499.
61. Huff SW, et al. (2004) Investigations into the phylogenetic relationships of freshwater pearl mussels (Bivalvia: Margaritiferidae) based on molecular data: Implications for their taxonomy and biogeography. *J Moll Stud* 70:379–388.
62. Janeczek LL, Honeycutt RL, Adkins RM, Davis SK (1996) Mitochondrial gene sequences and the molecular systematics of the Artiodactyl subfamily Bovinae. *Mol Phy Evol* 6:107–119.
63. Jansa SA, Voss R (2005) Phylogenetic relationships of the marsupial genus *Hyldadelphus* based on nuclear gene sequences and morphology. *J Mamm* 86:853–865.
64. Jansa SA, Barker FK, Heaney LR (2006) The pattern and timing of diversification of Philippine endemic rodents: Evidence from mitochondrial and nuclear gene sequences. *Syst Biol* 55:73–88.
65. Jansa SA, Goodman SM, Tucker PK (1999) Molecular phylogeny and biogeography of the native rodents of Madagascar (Muridae: Nesomyiinae): A test of the single-origin hypothesis. *Cladistics* 15:253–270.
66. Jones WJ, et al. (2006) Evolution of habitat use by deep-sea mussels. *Mar Biol* 148:841–851.
67. Kallersjo M, von Proschwitz T, Lundberg S, Elden P, Erseus C (2005) Evaluation of ITS rDNA as a complement to mitochondrial gene sequences for phylogenetic studies in freshwater mussels: An example using Unionidae from northwestern Europe. *Zool Scr* 34:415–424.
68. Kappner I, Bieler R (2006) Phylogeny of venus clams (Bivalvia: Venerinae) as inferred from nuclear and mitochondrial gene sequences. *Mol Phy Evol* 40:317–331.

69. Karanth KP, Delefosse T, Rakotosamimanana B, Parsons TJ, Yoder AD (2005) Ancient DNA from giant extinct lemurs confirms single origin of Malagasy primates. *Proc Natl Acad Sci USA* 102:5090–5095.
70. Kirkendale L, Lee T, Baker P, Foighil DO (2004) Oysters of the Conch Republic (Florida Keys): A molecular phylogenetic study of *Parahyotissa mcgintyi*, *Teskeyostrea weberi*, and *Ostreola equestris*. *Malacologia* 46:309–326.
71. Koepfli KP, Wayne RK (2003) Type ISTS markers are more informative than cytochrome *b* in phylogenetic reconstruction of the Mustelidae (Mammalia: Carnivora). *Syst Biol* 52:571–593.
72. Kohler F, von Rintelen T, Meyer A, Glaubrecht M (2004) Multiple origin of viviparity in Southeast Asian gastropods (Cerithioidea: Pachychilidae) and its evolutionary implications. *Evolution* 58:2215–2226.
73. Kojima S, Fujikura K, Okutani T (2004) Multiple trans-Pacific migrations of deep-sea vent/seep-endemic bivalves in the family Vesicomyidae. *Mol Phy Evol* 32:396–406.
74. Koufopanou V, Reid DG, Ridgway SA, Thomas RH (1999) A molecular phylogeny of the patellid limpets (Gastropoda: Patellicidae) and its implications for the origins of their antitropical distribution. *Mol Phy Evol* 11:138–156.
75. Krajewski C, Moyer GR, Sipiorski JT, Fain MG, Westerman M (2004) Molecular systematics of the enigmatic “phascoloriscine” marsupials of New Guinea. *Austral J Zool* 52:389–415.
76. Krajewski C, Wroe S, Westerman M (2000) Molecular evidence for the pattern and timing of cladogenesis in dasyurid marsupials. *Zool J Linn Soc* 130:375–404.
77. Krebs RA, Vlasceanu RN, Tevesz MJS (2003) An analysis of diversity in freshwater mussels (Bivalvia: Unionidae) of the Cuyahoga and Rocky river watersheds (Ohio, USA) based on the 16S rRNA gene. *J Great Lakes Res* 29:307–316.
78. Kuznetsova MV, Kholodova MV, Lushechina AA (2002) Phylogenetic analysis of sequences of the 12S and 16S rRNA mitochondrial genes in the family Bovidae: New evidence. *Russ J Genet* 38:942–950.
79. Lalueza-Fox C, Shapiro B, Bover P, Alcover JA, Bertranpetit J (2002) Molecular phylogeny and evolution of the extinct bovid *Myotragus balearicus*. *Mol Phy Evol* 25:501–510.
80. Latiolais JM, Taylor MS, Roy K, Hellberg ME (2006) A molecular phylogenetic analysis of strombid gastropod morphological diversity. *Mol Phy Evol* 41:436–444.
81. Lecompte F, Denys C, Granjon L (2005) Confrontation of morphological and molecular data: The *Praomys* group (Rodentia, Murinae) as a case of adaptive convergences and morphological stasis. *Mol Phy Evol* 37:899–919.
82. Ledje C, Arnason U (1996) Phylogenetic relationships within caniniform carnivores based on analyses of the mitochondrial 12S rRNA gene. *J Mol Evol* 43:641–649.
83. Lee T, Foighil DO (2003) Phylogenetic structure of the Sphaeriinae, a global clade of freshwater bivalve molluscs, inferred from nuclear (ITS-1) and mitochondrial (16S) ribosomal gene sequences. *Zool J Linn Soc* 137:245–260.
84. Lei RH, Jiang ZG, Hu Z, Yang WL (2003) Phylogenetic relationships of Chinese antelopes (subfamily Antilopinae) based on mitochondrial ribosomal RNA gene sequences. *J Zool* 261:227–237.
85. Lindgren AR, Katugin ON, Amezquita E, Nishiguchi MK (2005) Evolutionary relationships among squids of the family Gonatidae (Mollusca: Cephalopoda) inferred from three mitochondrial loci. *Mol Phy Evol* 36:101–111.
86. Liu HP, Hershler R (2005) Molecular systematics and radiation of western North American nymphophiline gastropods. *Mol Phy Evol* 34:284–298.
87. Liu HP, Hershler R, Thompson FG (2001) Phylogenetic relationships of the Cochliopinae (Rissooidea: Hydrobiidae): An enigmatic group of aquatic gastropods. *Mol Phy Evol* 21:17–25.
88. Manganelli G, Salomone N, Giusti F (2005) A molecular approach to the phylogenetic relationships of the western palaearctic Helicoidea (Gastropoda: Stylommatophora). *Biol J Linn Soc* 85:501–512.
89. Marko PB (2002) Fossil calibration of molecular clocks and the divergence times of geminate species pairs separated by the Isthmus of Panama. *Mol Biol Evol* 19:2005–2021.
90. Marko PB, Vermeij GJ (1999) Molecular phylogenetics and the evolution of labral spines among eastern Pacific Ocenebrine gastropods. *Mol Phy Evol* 13:275–288.
91. Marmi J, Lopez-Giraldez JF, Domingo-Roura X (2004) Phylogeny, evolutionary history, and taxonomy of the Mustelidae based on sequences of the cytochrome *b* gene and a complex repetitive flanking region. *Zool Scripta* 33:481–499.
92. Martin Y, Gerlach G, Schlotterer C, Meyer A (2000) Molecular phylogeny of European murid rodents based on complete cytochrome *b* sequences. *Mol Phy Evol* 16:37–47.
93. Matsumoto M, Hayami I (2000) Phylogenetic analysis of the family Pectinidae (Bivalvia) based on mitochondrial cytochrome C oxidase subunit I. *J Moll Stud* 66:477–488.
94. Matthee CA, Davis SK (2001) Molecular insights into the evolution of the family Bovidae: A nuclear DNA perspective. *Mol Biol Evol* 18:1220–1230.
95. Matthee CA, Robinson TJ (1999) Cytochrome *b* phylogeny of the family Bovidae: Resolution within the Alcelaphini, Antilopini, Neotragini, and Tragelaphini. *Mol Phy Evol* 12:31–46.
96. Matthee CA, van Vuuren BJ, Bell D, Robinson TJ (2004) A molecular supermatrix of the rabbits and hares (Leporidae) allows for the identification of five intercontinental exchanges during the Miocene. *Syst Biol* 53:433–447.
97. Matthee CA, et al. (2007) Indel evolution of mammalian introns and the utility of non-coding nuclear markers in eutherian phylogenetics. *Mol Phy Evol* 42:827–837.
98. May-Collado L, Agnarsson I (2006) Cytochrome *b* and Bayesian inference of whale phylogeny. *Mol Phy Evol* 38:344–354.
99. Meireles CM, et al. (1999) Molecular phylogeny of Atelinae new world monkeys (Platyrrhini, Ateleinae) based on  $\gamma$ -globin gene sequences: Evidence that *Brachyteles* is the sister group of *Lagothrix*. *Mol Phy Evol* 12:10–30.
100. Meyer CP (2004) Toward comprehensiveness: Increased molecular sampling within Cypraeidae and its phylogenetic implications. *Malacologia* 46:127–156.
101. Michel E (2004) *Vinundu*, a new genus of gastropod (Cerithioidea: ‘Thiaridae’) with two species from Lake Tanganyika, East Africa, and its molecular phylogenetic relationships. *J Moll Stud* 70:1–19.
102. Mikkelsen PM, Bieler R, Kappner I, Rawlings TA (2006) Phylogeny of Veneroidea (Mollusca: Bivalvia) based on morphology and molecules. *Zool J Linn Soc* 148:439–521.
103. Minton RL, Lydeard C (2003) Phylogeny, taxonomy, genetics, and global heritage ranks of an imperilled, freshwater snail genus *Lithasia* (Pleuroceridae). *Mol Ecol* 12:75–87.
104. Montgelard C, Matthee CA, Robinson TJ (2003) Molecular systematics of dormice (Rodentia: Gliridae) and the radiation of *Graphiurus* in Africa. *Proc R Soc London Ser B* 270:1947–1955.
105. Morgan JAT, et al. (2002) A phylogeny of planorbisid snails, with implications for the evolution of *Schistosoma* parasites. *Mol Phy Evol* 25:477–488.
106. Mouchaty S, Cook JA, Shields GF (1995) Phylogenetic analysis of northern hair seals based on nucleotide sequences of the mitochondrial cytochrome *b* gene. *J Mamm* 76:1178–1185.
107. Nakano T, Ozawa T (2007) Worldwide phylogeography of limpets of the order Patellogastropoda: Molecular, morphological, and palaeontological evidence. *J Moll Stud* 73:79–99.
108. Neumann K, et al. (2006) Molecular phylogeny of the Cricetinae subfamily based on the mitochondrial cytochrome *b* and 12S rRNA genes and the nuclear vWF gene. *Mol Phy Evol* 39:135–148.
109. Nieves M, Ascunce MS, Rahn MI, Mudry MD (2005) Phylogenetic relationships among some Ateles species: The use of chromosomal and molecular characters. *Primates* 46:155–164.
110. Norris RW, et al. (2004) The phylogenetic position of the zokors (Myospalacinae) and comments on the families of muroids (Rodentia). *Mol Phy Evol* 31:972–978.
111. Ohdachi SD, et al. (2006) Molecular phylogenetics of soricid shrews (Mammalia) based on mitochondrial cytochrome *b* gene sequences: With special reference to the Soricinae. *J Zool* 270:177–191.
112. Okusu A, Schwabe E, Eernisse DJ, Giribet G (2003) Towards a phylogeny of chitons (Mollusca, Polyplacophora) based on combined analysis of five molecular loci. *Org Divers Evol* 3:281–302.
113. Oliverio M, Cervelli M, Mariottini P (2002) ITS2 rRNA evolution and its congruence with the phylogeny of muricid neogastropods (Caenogastropoda, Muricoidea). *Mol Phy Evol* 25:63–69.
114. Oshida T, et al. (2004) Phylogenetic position of the small Kashmir flying squirrel, *Hylopetes fimbriatus* (*Eoglaucomys fimbriatus*), in the subfamily Pteromyinae. *Can J Zool* 82:1336–1342.
115. Owada M (2007) Functional morphology and phylogeny of the rock-boring bivalves *Leiosolenus* and *Lithophaga* (Bivalvia: Mytilidae): A third functional clade. *Mar Biol* 150:853–860.
116. Page SL, Chiu CH, Goodman M (1999) Molecular phylogeny of Old World monkeys (Cercopithecoidea) as inferred from  $\gamma$ -globin DNA sequences. *Mol Phy Evol* 13:348–359.
117. Pastorini J, Thalmann U, Martin RD (2003) A molecular approach to comparative phylogeography of extant Malagasy lemurs. *Proc Natl Acad Sci USA* 100:5879–5884.
118. Perez KE, Ponder WF, Colgan DJ, Clark SA, Lydeard C (2005) Molecular phylogeny and biogeography of spring-associated hydroboid snails of the Great Artesian Basin, Australia. *Mol Phy Evol* 34:545–556.
119. Piaggio AJ, Spicer GS (2001) Molecular phylogeny of the chipmunks inferred from mitochondrial cytochrome *b* and cytochrome oxidase II gene sequences. *Mol Phy Evol* 20:335–350.
120. Pitra C, Veits J (2000) Use of mitochondrial DNA sequences to test the Ceratomorpha (Perissodactyla: Mammalia) hypothesis. *J Zool Syst Evol Res* 38:65–72.
121. Pitra C, Fickel J, Meijaard E, Groves PC (2004) Evolution and phylogeny of Old World deer. *Mol Phy Evol* 33:880–895.
122. Querouil S, et al. (2001) Phylogeny and evolution of African shrews (Mammalia: Soricidae) inferred from 16S rRNA sequences. *Mol Phy Evol* 20:185–195.
123. Raterman D, Meredith RW, Ruedas LA, Springer MS (2006) Phylogenetic relationships of the cuscuses and brushtail possums (Marsupialia: Phalangeridae) using the nuclear gene BRCA1. *Austral J Zool* 54:353–361.
124. Reece KS, Cordes JF, Stubbs JB, Hudson KL, Francis EA, (2008) Molecular phylogenies help resolve taxonomic confusion with Asian *Crassostrea* oyster species. *Mar Biol* 153:709–721.
125. Reeder SA, Bradley RD (2004) Molecular systematics of neotomine-peromyscine rodents based on the dentin matrix protein 1 gene. *J Mamm* 85:1194–1200.
126. Reeder SA, Carroll DS, Edwards CW, Kilpatrick CW, Bradley RD (2006) Neotomine-peromyscine rodent systematics based on combined analyses of nuclear and mitochondrial DNA sequences. *Mol Phy Evol* 40:251–258.
127. Reid DG, Dyal P, Lozouet P, Glaubrecht M, Williams ST (2008) Mudwheleks and mangroves: The evolutionary history of an ecological association (Gastropoda: Potamididae). *Mol Phy Evol* 47:680–699.
128. Remigio EA, Hebert PDN (2003) Testing the utility of partial COI sequences for phylogenetic estimates of gastropod relationships. *Mol Phy Evol* 29:641–647.
129. Roe KJ, Lydeard C (1998) Species delineation and the identification of evolutionarily significant units: Lessons from the freshwater mussel genus *Potamilus* (Bivalvia: Unionidae). *J Shell Res* 17:1359–1363.
130. Roos C, Schmitz J, Zischler H (2004) Primate jumping genes elucidate strepsirrhine phylogeny. *Proc Natl Acad Sci USA* 101:10650–10654.
131. Ropiquet A, Hassanin A (2005) Molecular evidence for the polyphyly of the genus *Hemitragus* (Mammalia, Bovidae). *Mol Phy Evol* 36:154–168.

132. Ropiquet A, Hassanin A (2005) Molecular phylogeny of caprines (Bovidae, Antilopinae): The question of their origin and diversification during the Miocene. *J Zool Syst Evol Res* 43:49–60.
133. Ruiz-Garcia M, Alvarez D (2003) RFLP analysis of mtDNA from six platyrrhine genera: Phylogenetic inferences. *Folia Primatol* 74:59–70.
134. Rundell RJ, Holland BS, Cowie RH (2004) Molecular phylogeny and biogeography of the endemic Hawaiian Succineidae (Gastropoda: Pulmonata). *Mol Phy Evol* 31:246–255.
135. Sato JJ, et al. (2006) Evidence from nuclear DNA sequences sheds light on the phylogenetic relationships of Pinnipedia: single origin with affinity to Musteloidea. *Zool Sci* 23:125–146.
136. Sato JJ, et al. (2003) Phylogenetic relationships and divergence times among mustelids (Mammalia: Carnivora) based on nucleotide sequences of the nuclear interphotoreceptor retinoid binding protein and mitochondrial cytochrome *b* genes. *Zool Sci* 20:243–264.
137. Schander C, Halanych KM, Dahlgren T, Sundberg P (2003) Test of the monophyly of Odostomiinae and Turbonilliinae (Gastropoda, Heterobranchia, Pyramidellidae) based on 16S mtDNA sequences. *Zool Scr* 32:243–254.
138. Schneider JA, Foighil DO (1999) Phylogeny of giant clams (Cardiidae: Tridacninae) based on partial mitochondrial 16S rDNA gene sequences. *Mol Phy Evol* 13:59–66.
139. Sena L, et al. (2002) Mitochondrial COII gene sequences provide new insights into the phylogeny of marmoset species groups (Callitrichidae, Primates). *Folia Primatol* 73:240–251.
140. Shiels MH, Pasqual MS, Foighil DO (2007) Systematic, taxonomic, and biogeographic relationships of Argentine flat oysters. *Mol Phy Evol* 44:467–473.
141. Shinohara A, Campbell KL, Suzuki H (2003) Molecular phylogenetic relationships of moles, shrew moles, and desmans from the new and old worlds. *Mol Phy Evol* 27:247–258.
142. Smith MF (1998) Phylogenetic relationships and geographic structure in pocket gophers in the genus *Thomomys*. *Mol Phy Evol* 9:1–14.
143. Sousa Varela E, et al. (2007) Molecular phylogeny of mangrove oysters (Crassostrea) from Brazil. *J Moll Stud* 73:229–234.
144. Stanger-Hall K, Cunningham CW (1998) Support for a monophyletic Lemuriformes: Overcoming incongruence between data partitions. *Mol Biol Evol* 15:1572–1577.
145. Steiner C, Tilak M, Douzery EJP, Catzeflis FM (2005) New DNA data from a transthyretin nuclear intron suggest an Oligocene to Miocene diversification of living South America opossums (Marsupialia: Didelphidae). *Mol Phy Evol* 35:363–379.
146. Steiner G, Dreyer H (2003) Molecular phylogeny of Scaphopoda (Mollusca) inferred from 18S rDNA sequences: Support for a Scaphopoda-Cephalopoda clade. *Zool Scr* 32:343–356.
147. Steiner G, Reynolds PD (2003) Molecular systematics of the Scaphopoda. *Molecular Systematics and Phylogeography of Mollusks*, eds Lydeard C, Lindberg DR (Smithsonian Books, Washington, DC), pp 123–139.
148. Steinke D, Albrecht C, Pfenninger M (2004) Molecular phylogeny and character evolution in the Western Palaeartic Helicidae s.l. (Gastropoda: Stylommatophora). *Mol Phy Evol* 32:724–734.
149. Steppan SJ, Storz BL, Hoffmann RS (2004) Nuclear DNA phylogeny of the squirrels (Mammalia: Rodentia) and the evolution of arboreality from *c-myc* and *RAG1*. *Mol Phy Evol* 30:703–719.
150. Steppan SJ, Adkins RM, Spinks PQ, Hale C (2005) Multigene phylogeny of the Old World mice, Murinae, reveals distinct geographic lineages and the declining utility of mitochondrial genes compared to nuclear genes. *Mol Phy Evol* 37:370–388.
151. Takacs Z, Morales JC, Geissmann T, Melnick DJ (2005) A complete species-level phylogeny of the Hylobatidae based on mitochondrial ND3-ND4 gene sequences. *Mol Phy Evol* 36:456–467.
152. Taylor JD, Williams ST, Glover EA (2007) Evolutionary relationships of the bivalve family Thyasiridae (Mollusca: Bivalvia), monophyly and superfamily status. *J Mar Biol Assoc UK* 87:565–574.
153. Tongkerd P, Lee T, Panha S, Burch JB, Foighil DO (2004) Molecular phylogeny of certain Thai gastrocoptine micro land snails (Stylommatophora: Pupillidae) inferred from mitochondrial and nuclear ribosomal DNA sequences. *J Moll Stud* 70:139–147.
154. Tosi AJ, Melnick DJ, Disotell TR (2004) Sex chromosome phylogenetics indicate a single transition to terrestriality in the guenons (tribe Cercopithecini). *J Hum Evol* 46:223–237.
155. Tosi AJ, Detwiler KM, Disotell TR (2005) X-chromosomal window into the evolutionary history of the guenons (Primates: Cercopithecini). *Mol Phy Evol* 36:58–66.
156. Valdes A (2003) Preliminary molecular phylogeny of the radula-less dorids (Gastropoda: Opisthobranchia), based on 16S mtDNA sequence data. *J Moll Stud* 69:75–80.
157. Veron G, Colyn M, Dunham AE, Taylor P, Gaubert P (2004) Molecular systematics and origin of sociality in mongooses (Herpestidae, Carnivora). *Mol Phy Evol* 30:582–598.
158. von Dornum M, Ruvolo M (1999) Phylogenetic relationships of the New World monkeys (Primates, Platyrrhini) based on nuclear G6PD DNA sequences. *Mol Phy Evol* 11:459–476.
159. Wagele H, Vonneman V, Wagele W (2003) Toward a phylogeny of the Opisthobranchia. *Molecular Systematics and Phylogeography of Mollusks*, eds Lydeard C, Lindberg DR (Smithsonian Books, Washington, DC), pp 185–228.
160. Weksler M (2003) Phylogeny of Neotropical oryzomyine rodents (Muridae: Sigmodontinae) based on the nuclear IRBP exon. *Mol Phy Evol* 29:331–349.
161. Weksler M (2006) Phylogenetic relationships of oryzomyine rodents (Muroidea: Sigmodontinae): separate and combined analyses of morphological and molecular data. *Bull Am Mus Nat Hist* 296:3–149.
162. Williams ST, Ozawa T (2006) Molecular phylogeny suggests polyphyly of both the turban shells (family Turbinidae) and the superfamily Trochoidea (Mollusca: Vetigastropoda). *Mol Phy Evol* 39:33–51.
163. Williams ST, Reid DG, Littlewood DTJ (2003) A molecular phylogeny of the Littoriniinae (Gastropoda: Littorinidae): Unequal evolutionary rates, morphological parallelism, and biogeography of the Southern Ocean. *Mol Phy Evol* 28:60–86.
164. Williams ST, Taylor JD, Glover EA (2004) Molecular phylogeny of the Lucinoidea (Bivalvia): Nonmonophyly and separate acquisition of bacterial chemosymbiosis. *J Moll Stud* 70:187–202.
165. Williams ST (2007) Origins and diversification of Indo-West Pacific marine fauna: Evolutionary history and biogeography of turban shells (Gastropoda, Turbinidae) *Biol J Linn Soc* 92:573–592.
166. Wilson AB, Glaubrecht M, Meyer A (2004) Ancient lakes as evolutionary reservoirs: Evidence from the thalassoid gastropods of Lake Tanganyika. *Proc R Soc London Ser B* 271:529–536.
167. Wilson NG, Lee MSY (2005) Molecular phylogeny of Chromodoris (Mollusca, Nudibranchia) and the identification of a planar spawning clade. *Mol Phy Evol* 36:722–727.
168. Wollscheid E, Wagele H (1999) Initial results on the molecular phylogeny of the nudibranchia (Gastropoda, Opisthobranchia) based on 18S rDNA data. *Mol Phy Evol* 13:215–226.
169. Wollscheid-Lengeling E, Boore J, Brown W, Wagele H (2001) The phylogeny of Nudibranchia (Opisthobranchia, Gastropoda, Mollusca) reconstructed by three molecular markers. *Org Divers Evol* 1:241–256.
170. Wood AR, Apte S, MacAvoy ES, Gardner JPA (2007) A molecular phylogeny of the marine mussel genus *Perna* (Bivalvia: Mytilidae) based on nuclear (ITS1&2) and mitochondrial (COI) DNA sequences. *Mol Phy Evol* 44:685–698.
171. Wynen LP, et al. (2001) Phylogenetic relationships within the eared seals (Otariidae: Carnivora): Implications for the historical biogeography of the family. *Mol Phy Evol* 21:270–284.
172. Xing JC, et al. (2005) A mobile element based phylogeny of Old World monkeys. *Mol Phy Evol* 37:872–880.
173. Yan H, Zhou KY, Yang G (2005) Molecular phylogenetics of “river dolphins” and the baiji mitochondrial genome. *Mol Phy Evol* 37:743–750.
174. Yu L, Zhang YP (2005) Phylogenetic studies of pantherine cats (Felidae) based on multiple genes, with novel application of nuclear  $\beta$ -fibrinogen intron 7 to carnivores. *Mol Phy Evol* 35:483–495.
175. Yu L, Li QW, Ryder OA, Zhang YP (2004) Phylogeny of the bears (Ursidae) based on nuclear and mitochondrial genes. *Mol Phy Evol* 32:480–494.
176. Yu L, Li YW, Ryder OA, Zhang YP (2007) Analysis of complete mitochondrial genome sequences increases phylogenetic resolution of bears (Ursidae), a mammalian family that experienced rapid speciation. *BMC Evol Biol* 7:1–11.
177. Canavez FC, et al. (1999) Molecular phylogeny of New World primates (Platyrrhini) based on  $\beta^2$ -microglobulin DNA sequences. *Mol Phy Evol* 12:74–82.
178. de Weerd DRU, Piel WH, Gittenberger E (2004) Widespread polyphyly among Alopinae snail genera: When phylogeny mirrors biogeography more closely than morphology. *Mol Phy Evol* 33:533–548.
179. Arnason U, Gullberg A (1996) Cytochrome *b* nucleotide sequences and the identification of five primary lineages of extant Cetaceans. *Mol Biol Evol* 13:407–417.
180. Galewski T, Mauffrey JF, Leite YLR, Patton JL, Douzery EJP (2005) Ecomorphological diversification among South American spiny rats (Rodentia: Echimyidae): a phylogenetic and chronological approach. *Mol Phy Evol* 34:601–615.
181. Galewski T, et al. (2006) The evolutionary radiation of Arvicolinae rodents (voles and lemmings): Relative contribution of nuclear and mitochondrial DNA phylogenies. *BMC Evol Biol* 6:1–17.

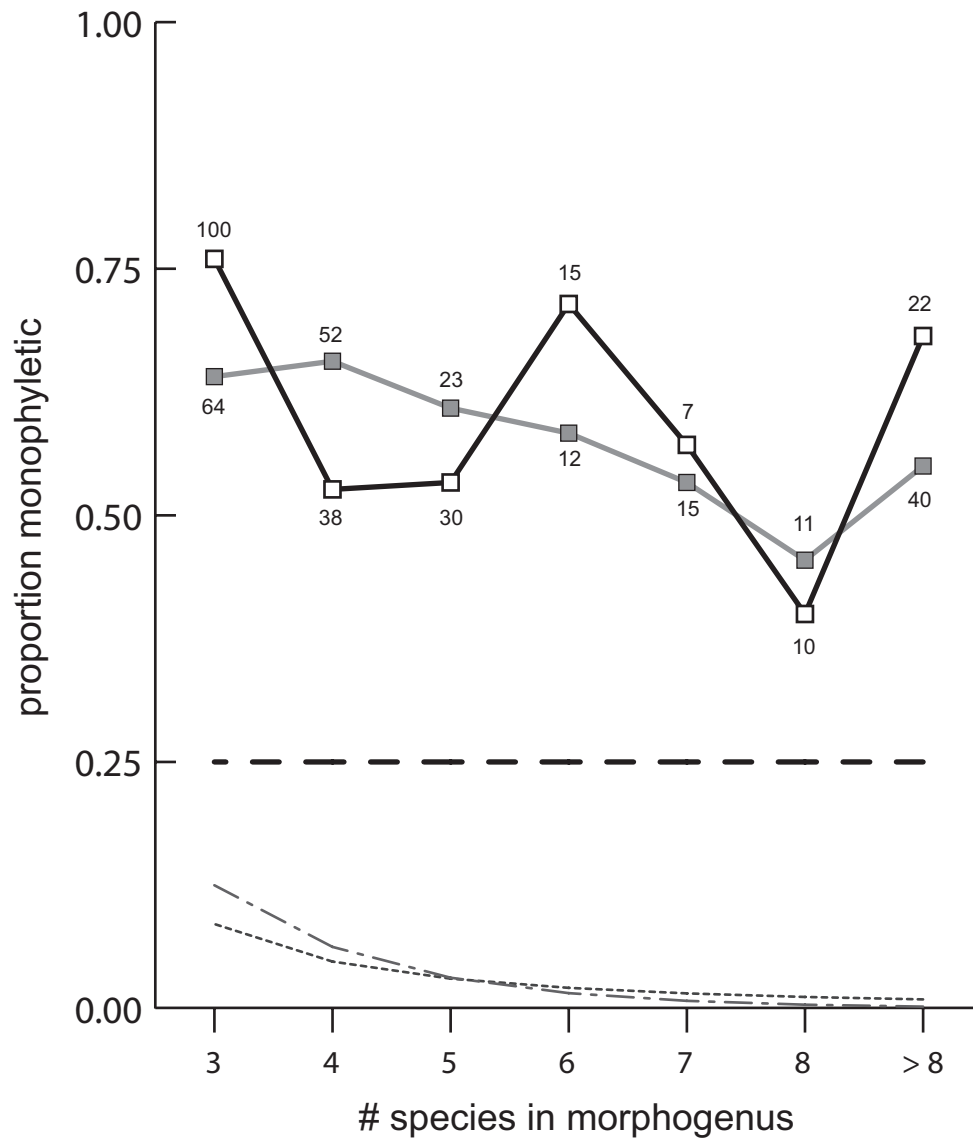

**Fig. S1.** Proportion of monophyletic morphogenera as a function of the number of species in the morphogenus included in the molecular phylogeny. The sample sizes of analyzed morphogenera are shown next to each data point. Genera with >8 species are grouped together because of low numbers of molecular analyses sampling large numbers of species in the same genus. Black line with open squares: Mammalia; gray line with filled squares: Mollusca. Dashed, horizontal line is the 25% cutoff for the expectation of monophyly (model 3). Below are the maximum expected monophyly rates at each morphogenus size for the coin-flip model (dot-dash line: model 2), and the random permutation model (dotted line: model 1). At all sizes, observed monophyly rates are significantly higher than those expected if morphogenera contained no phylogenetic information.

Table S1. Primary data for molecular phylogenies surveyed in this analysis

| Ref. | Phylum   | Class    | Clade           | Genus          | Marine (M)/nonmarine (NM) |       |     |        |        | # species in genus | Uni-para-phyletic | Multi-para-phyletic | Poly-phyletic |   |
|------|----------|----------|-----------------|----------------|---------------------------|-------|-----|--------|--------|--------------------|-------------------|---------------------|---------------|---|
|      |          |          |                 |                | ngen                      | ntaxa | MC3 | MPBoot | MLBoot |                    |                   |                     |               |   |
| 32   | Chordata | Mammalia | "Insectivora"   | Chodsigoa      | 18                        | 74    | 100 | 100    | 100    | 3                  | 1                 | 0                   | 0             | 0 |
| 32   | Chordata | Mammalia | "Insectivora"   | Crocidura      | 18                        | 74    | 100 | 84     | 100    | 12                 | 1                 | 0                   | 0             | 0 |
| 97   | Chordata | Mammalia | "Insectivora"   | Crocidura      | 109                       | 158   | >95 | >70    |        | 4                  | 1                 | 0                   | 0             | 0 |
| 111  | Chordata | Mammalia | "Insectivora"   | Crocidura      | 15                        | 76    |     |        | 75     | 12                 | 1                 | 0                   | 0             | 0 |
| 32   | Chordata | Mammalia | "Insectivora"   | Cryptotis      | 18                        | 74    | 100 | 99     | 100    | 3                  | 1                 | 0                   | 0             | 0 |
| 111  | Chordata | Mammalia | "Insectivora"   | Cryptotis      | 15                        | 76    |     |        | 78     | 4                  | 1                 | 0                   | 0             | 0 |
| 111  | Chordata | Mammalia | "Insectivora"   | Episorculus    | 15                        | 76    |     |        | 53     | 4                  | 0                 | 0                   | 0             | 1 |
| 141  | Chordata | Mammalia | "Insectivora"   | Mogera         | 15                        | 21    |     |        | 81     | 4                  | 1                 | 0                   | 0             | 0 |
| 32   | Chordata | Mammalia | "Insectivora"   | Myosorex       | 18                        | 74    | 100 | 100    | 100    | 3                  | 1                 | 0                   | 0             | 0 |
| 141  | Chordata | Mammalia | "Insectivora"   | Scapanus       | 15                        | 21    |     |        | 93     | 3                  | 1                 | 0                   | 0             | 0 |
| 32   | Chordata | Mammalia | "Insectivora"   | Sorex          | 18                        | 74    | 100 | 100    | 100    | 11                 | 1                 | 0                   | 0             | 0 |
| 111  | Chordata | Mammalia | "Insectivora"   | Sorex          | 15                        | 76    |     |        | 78     | 37                 | 1                 | 0                   | 0             | 0 |
| 32   | Chordata | Mammalia | "Insectivora"   | Suncus         | 18                        | 74    | 100 | 99     | 97     | 6                  | 0                 | 0                   | 1             | 0 |
| 122  | Chordata | Mammalia | "Insectivora"   | Suncus         | 10                        | 27    |     |        | 1      | 6                  | 0                 | 0                   | 0             | 1 |
| 122  | Chordata | Mammalia | "Insectivora"   | Sylvisorex     | 10                        | 27    |     |        | 70     | 4                  | 0                 | 0                   | 0             | 1 |
| 39   | Chordata | Mammalia | Carnivora       | Arctocephalus  | 47                        | 77    | 100 | 94     |        | 3                  | 0                 | 1                   | 0             | 0 |
| 171  | Chordata | Mammalia | Carnivora       | Arctocephalus  | 7                         | 14    |     |        | 41     | 8                  | 0                 | 0                   | 0             | 1 |
| 7    | Chordata | Mammalia | Carnivora       | Canis          | 14                        | 23    | 99  | 1      | 1      | 7                  | 1                 | 0                   | 0             | 0 |
| 38   | Chordata | Mammalia | Carnivora       | Canis          | 57                        | 74    | 100 | 100    |        | 3                  | 1                 | 0                   | 0             | 0 |
| 38   | Chordata | Mammalia | Carnivora       | Felis          | 57                        | 74    | 59  |        |        | 4                  | 0                 | 0                   | 0             | 1 |
| 44   | Chordata | Mammalia | Carnivora       | Genetta        | 23                        | 34    | 100 | 100    | 100    | 7                  | 1                 | 0                   | 0             | 0 |
| 43   | Chordata | Mammalia | Carnivora       | Genetta        | 14                        | 22    |     |        | 100    | 6                  | 1                 | 0                   | 0             | 0 |
| 44   | Chordata | Mammalia | Carnivora       | Herpestes      | 23                        | 34    | 100 | 100    | 100    | 3                  | 0                 | 1                   | 0             | 0 |
| 157  | Chordata | Mammalia | Carnivora       | Herpestes      | 13                        | 19    |     |        | 1      | 4                  | 0                 | 0                   | 0             | 1 |
| 39   | Chordata | Mammalia | Carnivora       | Lontra         | 47                        | 77    | 100 | 100    |        | 3                  | 1                 | 0                   | 0             | 0 |
| 71   | Chordata | Mammalia | Carnivora       | Lontra         | 16                        | 22    | 100 | 100    | 100    | 3                  | 1                 | 0                   | 0             | 0 |
| 38   | Chordata | Mammalia | Carnivora       | Martes         | 57                        | 74    | 100 | 86     |        | 3                  | 0                 | 0                   | 0             | 1 |
| 39   | Chordata | Mammalia | Carnivora       | Martes         | 47                        | 77    | 100 | 87     |        | 7                  | 0                 | 0                   | 0             | 1 |
| 91   | Chordata | Mammalia | Carnivora       | Martes         | 11                        | 18    | 100 |        |        | 3                  | 0                 | 1                   | 0             | 0 |
| 136  | Chordata | Mammalia | Carnivora       | Martes         | 5                         | 17    |     |        | 81     | 5                  | 0                 | 1                   | 0             | 0 |
| 135  | Chordata | Mammalia | Carnivora       | Martes         | 14                        | 29    | 100 | 100    | 100    | 6                  | 0                 | 1                   | 0             | 0 |
| 31   | Chordata | Mammalia | Carnivora       | Mustela        | 22                        | 24    |     |        | 95     | 3                  | 1                 | 0                   | 0             | 0 |
| 35   | Chordata | Mammalia | Carnivora       | Mustela        | 98                        | 118   |     |        | 95     | 3                  | 0                 | 0                   | 0             | 1 |
| 38   | Chordata | Mammalia | Carnivora       | Mustela        | 57                        | 74    | 100 | 99     |        | 7                  | 1                 | 0                   | 0             | 0 |
| 39.  | Chordata | Mammalia | Carnivora       | Mustela        | 47                        | 77    | 100 | 100    |        | 11                 | 1                 | 0                   | 0             | 0 |
| 71   | Chordata | Mammalia | Carnivora       | Mustela        | 16                        | 22    | 100 | 100    | 100    | 3                  | 1                 | 0                   | 0             | 0 |
| 82   | Chordata | Mammalia | Carnivora       | Mustela        | 24                        | 32    |     |        | 74     | 3                  | 1                 | 0                   | 0             | 0 |
| 91   | Chordata | Mammalia | Carnivora       | Mustela        | 11                        | 18    | 100 |        |        | 6                  | 1                 | 0                   | 0             | 0 |
| 136  | Chordata | Mammalia | Carnivora       | Mustela        | 5                         | 17    |     |        | 100    | 8                  | 1                 | 0                   | 0             | 0 |
| 135  | Chordata | Mammalia | Carnivora       | Mustela        | 14                        | 29    | 100 | 100    | 100    | 9                  | 1                 | 0                   | 0             | 0 |
| 38   | Chordata | Mammalia | Carnivora       | Panthera       | 57                        | 74    |     |        | 71     | 3                  | 0                 | 1                   | 0             | 0 |
| 174  | Chordata | Mammalia | Carnivora       | Panthera       | 9                         | 14    |     |        |        | 99                 | 5                 | 1                   | 0             | 0 |
| 39   | Chordata | Mammalia | Carnivora       | Phoca          | 47                        | 77    | 100 | 79     |        | 5                  | 1                 | 0                   | 0             | 0 |
| 106  | Chordata | Mammalia | Carnivora       | Phoca          | 4                         | 8     |     |        | 98     | 5                  | 0                 | 0                   | 1             | 0 |
| 7    | Chordata | Mammalia | Carnivora       | Pseudalopex    | 14                        | 23    | 100 | 100    | 100    | 3                  | 1                 | 0                   | 0             | 0 |
| 5    | Chordata | Mammalia | Carnivora       | Ursus          | 26                        | 29    | 100 | 100    |        | 3                  | 0                 | 1                   | 0             | 0 |
| 26   | Chordata | Mammalia | Carnivora       | Ursus          | 27                        | 35    | 100 | 100    |        | 4                  | 1                 | 0                   | 0             | 0 |
| 82   | Chordata | Mammalia | Carnivora       | Ursus          | 24                        | 32    |     |        | 100    | 3                  | 1                 | 0                   | 0             | 0 |
| 175  | Chordata | Mammalia | Carnivora       | Ursus          | 4                         | 7     | 95  | 80     | 68     | 4                  | 0                 | 1                   | 0             | 0 |
| 176  | Chordata | Mammalia | Carnivora       | Ursus          | 4                         | 8     | 95  | 72     | 85     | 4                  | 0                 | 1                   | 0             | 0 |
| 44   | Chordata | Mammalia | Carnivora       | Viverra        | 23                        | 34    | 100 | 95     | 87     | 3                  | 1                 | 0                   | 0             | 0 |
| 43   | Chordata | Mammalia | Carnivora       | Viverra        | 14                        | 22    |     |        | 100    | 3                  | 1                 | 0                   | 0             | 0 |
| 7    | Chordata | Mammalia | Carnivora       | Vulpes         | 14                        | 23    | 100 | 100    | 100    | 3                  | 0                 | 1                   | 0             | 0 |
| 5    | Chordata | Mammalia | Cetartiodactyla | Balaenoptera   | 32                        | 38    |     |        | 83     | 4                  | 0                 | 1                   | 0             | 0 |
| 98   | Chordata | Mammalia | Cetartiodactyla | Balaenoptera   | 39                        | 63    | 100 |        |        | 3                  | 0                 | 0                   | 0             | 1 |
| 173  | Chordata | Mammalia | Cetartiodactyla | Balaenoptera   | 15                        | 17    | 100 |        |        | 95                 | 3                 | 1                   | 0             | 0 |
| 51   | Chordata | Mammalia | Cetartiodactyla | Bos            | 8                         | 16    | 100 | 90     |        | 5                  | 0                 | 0                   | 1             | 0 |
| 62   | Chordata | Mammalia | Cetartiodactyla | Bos            | 7                         | 11    |     |        | 71     | 4                  | 0                 | 1                   | 0             | 0 |
| 53   | Chordata | Mammalia | Cetartiodactyla | Bubalus        | 36                        | 51    |     |        | 100    | 4                  | 1                 | 0                   | 0             | 0 |
| 53   | Chordata | Mammalia | Cetartiodactyla | Capra          | 36                        | 51    |     |        | 90     | 3                  | 0                 | 1                   | 0             | 0 |
| 54   | Chordata | Mammalia | Cetartiodactyla | Capra          | 15                        | 30    |     |        | 93     | 8                  | 0                 | 1                   | 0             | 0 |
| 78   | Chordata | Mammalia | Cetartiodactyla | Capra          | 19                        | 21    |     |        | 100    | 3                  | 1                 | 0                   | 0             | 0 |
| 131  | Chordata | Mammalia | Cetartiodactyla | Capra          | 30                        | 33    | 100 |        |        | 3                  | 0                 | 1                   | 0             | 0 |
| 131  | Chordata | Mammalia | Cetartiodactyla | Capra          | 30                        | 33    |     |        | 78     | 3                  | 1                 | 0                   | 0             | 0 |
| 132  | Chordata | Mammalia | Cetartiodactyla | Capra          | 20                        | 30    | 100 |        |        | 100                | 5                 | 0                   | 1             | 0 |
| 54   | Chordata | Mammalia | Cetartiodactyla | Capricornis    | 15                        | 30    |     |        | 80     | 3                  | 1                 | 0                   | 0             | 0 |
| 23   | Chordata | Mammalia | Cetartiodactyla | Cervus         | 18                        | 23    |     |        | 97     | 3                  | 0                 | 1                   | 0             | 0 |
| 45   | Chordata | Mammalia | Cetartiodactyla | Cervus         | 15                        | 25    | 100 | 100    |        | 7                  | 0                 | 0                   | 0             | 1 |
| 121  | Chordata | Mammalia | Cetartiodactyla | Cervus         | 9                         | 16    |     |        |        | 3                  | 0                 | 0                   | 0             | 1 |
| 98   | Chordata | Mammalia | Cetartiodactyla | Delphinus      | 39                        | 63    | 100 |        |        | 3                  | 1                 | 0                   | 0             | 0 |
| 53   | Chordata | Mammalia | Cetartiodactyla | Gazella        | 36                        | 51    |     |        | 89     | 3                  | 0                 | 1                   | 0             | 0 |
| 10   | Chordata | Mammalia | Cetartiodactyla | Kobus          | 3                         | 12    |     |        | 100    | 8                  | 1                 | 0                   | 0             | 0 |
| 98   | Chordata | Mammalia | Cetartiodactyla | Lagenorhynchus | 39                        | 63    | 99  |        |        | 4                  | 0                 | 0                   | 0             | 1 |
| 179  | Chordata | Mammalia | Cetartiodactyla | Mesoplodon     | 32                        | 38    |     |        | 63     | 3                  | 0                 | 0                   | 0             | 1 |
| 121  | Chordata | Mammalia | Cetartiodactyla | Muntiacus      | 9                         | 16    | 100 | 100    | 1      | 3                  | 1                 | 0                   | 0             | 0 |
| 42   | Chordata | Mammalia | Cetartiodactyla | Oryx           | 16                        | 22    |     |        | 82     | 3                  | 1                 | 0                   | 0             | 0 |



| Ref. | Phylum   | Class    | Clade          | Genus            | Marine (M)/nonmarine |      |       |     |        | # species |          |               |               |                     |               |   |
|------|----------|----------|----------------|------------------|----------------------|------|-------|-----|--------|-----------|----------|---------------|---------------|---------------------|---------------|---|
|      |          |          |                |                  | (NM)                 | ngen | ntaxa | MC3 | MPBoot | MLBoot    | in genus | Mono-phyletic | para-phyletic | Multi-para-phyletic | Poly-phyletic |   |
| 15   | Chordata | Mammalia | Primates       | Saguinus         |                      | 7    | 21    |     | 100    |           |          | 6             | 1             | 0                   | 0             | 0 |
| 177  | Chordata | Mammalia | Primates       | Saimiri          |                      | 16   | 25    |     | 100    |           |          | 3             | 1             | 0                   | 0             | 0 |
| 158  | Chordata | Mammalia | Primates       | Saimiri          |                      | 15   | 22    |     | 100    |           |          | 3             | 1             | 0                   | 0             | 0 |
| 59   | Chordata | Mammalia | Rodentia       | Aconaemys        |                      | 10   | 15    |     |        | 93        |          | 3             | 0             | 1                   | 0             | 0 |
| 56   | Chordata | Mammalia | Rodentia       | Ammospermophilus |                      | 21   | 124   | 90  | 85     |           |          | 3             | 1             | 0                   | 0             | 0 |
| 19   | Chordata | Mammalia | Rodentia       | Apodemus         |                      | 4    | 21    | 100 | 100    | 100       |          | 3             | 1             | 0                   | 0             | 0 |
| 92   | Chordata | Mammalia | Rodentia       | Apodemus         |                      | 9    | 18    |     | 1      | 89        |          | 6             | 1             | 0                   | 0             | 0 |
| 150  | Chordata | Mammalia | Rodentia       | Apodemus         |                      | 51   | 63    | 100 | 96     | 100       |          | 3             | 1             | 0                   | 0             | 0 |
| 64   | Chordata | Mammalia | Rodentia       | Apomys           |                      | 23   | 36    | 100 | 100    | 100       |          | 3             | 1             | 0                   | 0             | 0 |
| 64   | Chordata | Mammalia | Rodentia       | Bullimus         |                      | 23   | 36    | 100 | 100    | 100       |          | 3             | 1             | 0                   | 0             | 0 |
| 56   | Chordata | Mammalia | Rodentia       | Callosciurus     |                      | 21   | 124   | 100 | 99     |           |          | 6             | 1             | 0                   | 0             | 0 |
| 36   | Chordata | Mammalia | Rodentia       | Calomys          |                      | 29   | 39    |     | 100    |           |          | 3             | 0             | 0                   | 0             | 1 |
| 2    | Chordata | Mammalia | Rodentia       | Chaetodipus      |                      | 6    | 52    | 100 | 85     |           |          | 15            | 1             | 0                   | 0             | 0 |
| 64   | Chordata | Mammalia | Rodentia       | Chrotomys        |                      | 23   | 36    | 100 | 100    | 100       |          | 3             | 1             | 0                   | 0             | 0 |
| 22   | Chordata | Mammalia | Rodentia       | Clethrionomys    |                      | 14   | 24    | 95  |        |           |          | 6             | 0             | 0                   | 0             | 1 |
| 108  | Chordata | Mammalia | Rodentia       | Cricetulus       |                      | 6    | 15    | 100 | 100    | 100       |          | 4             | 0             | 0                   | 1             | 0 |
| 37   | Chordata | Mammalia | Rodentia       | Cryptomys        |                      | 4    | 14    |     | 100    |           |          | 9             | 1             | 0                   | 0             | 0 |
| 56   | Chordata | Mammalia | Rodentia       | Cynomys          |                      | 21   | 124   | 100 | 100    |           |          | 5             | 1             | 0                   | 0             | 0 |
| 2    | Chordata | Mammalia | Rodentia       | Dipodomys        |                      | 6    | 52    | 100 | 97     |           |          | 22            | 1             | 0                   | 0             | 0 |
| 65   | Chordata | Mammalia | Rodentia       | Eliurus          |                      | 22   | 30    |     | 99     | 85        |          | 8             | 0             | 1                   | 0             | 0 |
| 22   | Chordata | Mammalia | Rodentia       | Eothenomys       |                      | 14   | 24    |     |        |           |          | 4             | 0             | 0                   | 0             | 1 |
| 18   | Chordata | Mammalia | Rodentia       | Gerbillurus      |                      | 11   | 28    | >95 | >90    | >90       |          | 3             | 1             | 0                   | 0             | 0 |
| 18   | Chordata | Mammalia | Rodentia       | Gerbillus        |                      | 11   | 28    | >95 | >90    | >90       |          | 4             | 1             | 0                   | 0             | 0 |
| 104  | Chordata | Mammalia | Rodentia       | Graphiurus       |                      | 7    | 14    | 100 | 100    | 100       |          | 6             | 1             | 0                   | 0             | 0 |
| 114  | Chordata | Mammalia | Rodentia       | Hylopetes        |                      | 5    | 10    |     |        | 90        |          | 3             | 0             | 1                   | 0             | 0 |
| 180  | Chordata | Mammalia | Rodentia       | Isothrix         |                      | 18   | 35    |     |        | 100       |          | 3             | 1             | 0                   | 0             | 0 |
| 81   | Chordata | Mammalia | Rodentia       | Malacomys        |                      | 20   | 35    |     | 100    |           |          | 3             | 0             | 0                   | 0             | 1 |
| 56   | Chordata | Mammalia | Rodentia       | Marmota          |                      | 21   | 124   | 100 | 100    | 100       |          | 14            | 1             | 0                   | 0             | 0 |
| 149  | Chordata | Mammalia | Rodentia       | Marmota          |                      | 21   | 34    | 100 | 99     | 9         |          | 3             | 1             | 0                   | 0             | 0 |
| 81   | Chordata | Mammalia | Rodentia       | Mastomys         |                      | 20   | 35    |     | 1      |           |          | 4             | 0             | 0                   | 0             | 1 |
| 18   | Chordata | Mammalia | Rodentia       | Meriones         |                      | 11   | 28    | >95 | >90    | >90       |          | 6             | 1             | 0                   | 0             | 0 |
| 108  | Chordata | Mammalia | Rodentia       | Mesocricetus     |                      | 6    | 15    | 100 | 100    | 100       |          | 5             | 1             | 0                   | 0             | 0 |
| 181  | Chordata | Mammalia | Rodentia       | Microtus         |                      | 14   | 25    | 97  |        | 50        |          | 11            | 0             | 1                   | 0             | 0 |
| 92   | Chordata | Mammalia | Rodentia       | Microtus         |                      | 9    | 18    |     | 97     | 100       |          | 3             | 1             | 0                   | 0             | 0 |
| 19   | Chordata | Mammalia | Rodentia       | Mus              |                      | 4    | 21    | 100 | 100    | 100       |          | 16            | 1             | 0                   | 0             | 0 |
| 35   | Chordata | Mammalia | Rodentia       | Mus              |                      | 98   | 118   |     | 81     |           |          | 8             | 0             | 0                   | 0             | 1 |
| 92   | Chordata | Mammalia | Rodentia       | Mus              |                      | 9    | 18    |     | 100    | 100       |          | 3             | 1             | 0                   | 0             | 0 |
| 81   | Chordata | Mammalia | Rodentia       | Myomys           |                      | 20   | 35    |     | 100    | 100       |          | 6             | 0             | 0                   | 0             | 1 |
| 110  | Chordata | Mammalia | Rodentia       | Myospalax        |                      | 20   | 27    |     | 100    | 100       |          | 7             | 1             | 0                   | 0             | 0 |
| 160  | Chordata | Mammalia | Rodentia       | Neacomys         |                      | 16   | 40    |     | 96     |           |          | 3             | 1             | 0                   | 0             | 0 |
| 161  | Chordata | Mammalia | Rodentia       | Neacomys         |                      | 19   | 47    |     |        | 98        |          | 3             | 1             | 0                   | 0             | 0 |
| 56   | Chordata | Mammalia | Rodentia       | Neotamias        |                      | 21   | 124   | 100 | 100    |           |          | 22            | 1             | 0                   | 0             | 0 |
| 12   | Chordata | Mammalia | Rodentia       | Neotoma          |                      | 15   | 28    | 100 | 62     |           |          | 3             | 1             | 0                   | 0             | 0 |
| 125  | Chordata | Mammalia | Rodentia       | Neotoma          |                      | 19   | 13    | 99  | 100    |           |          | 3             | 1             | 0                   | 0             | 0 |
| 126  | Chordata | Mammalia | Rodentia       | Neotoma          |                      | 13   | 19    |     | 99     |           |          | 3             | 1             | 0                   | 0             | 0 |
| 161  | Chordata | Mammalia | Rodentia       | Oecomys          |                      | 19   | 47    |     |        | 74        |          | 5             | 1             | 0                   | 0             | 0 |
| 160  | Chordata | Mammalia | Rodentia       | Oligoryzomys     |                      | 16   | 40    |     | 97     |           |          | 98            | 5             | 1                   | 0             | 0 |
| 161  | Chordata | Mammalia | Rodentia       | Oligoryzomys     |                      | 19   | 47    |     |        | 98        |          | 5             | 1             | 0                   | 0             | 0 |
| 41   | Chordata | Mammalia | Rodentia       | Octodon          |                      | 7    | 11    |     |        | 93        |          | 3             | 1             | 0                   | 0             | 0 |
| 59   | Chordata | Mammalia | Rodentia       | Octodon          |                      | 10   | 15    |     |        |           | 89       | 3             | 1             | 0                   | 0             | 0 |
| 161  | Chordata | Mammalia | Rodentia       | Oryzomys         |                      | 19   | 47    |     |        |           | 73       | 16            | 0             | 0                   | 0             | 1 |
| 160  | Chordata | Mammalia | Rodentia       | Oryzomys         |                      | 16   | 40    |     | 72     |           | 83       | 16            | 0             | 0                   | 0             | 1 |
| 149  | Chordata | Mammalia | Rodentia       | Paraxerus        |                      | 21   | 34    | 100 | 100    | 100       |          | 3             | 1             | 0                   | 0             | 0 |
| 2    | Chordata | Mammalia | Rodentia       | Perognathus      |                      | 6    | 52    | 100 | 83     |           |          | 10            | 1             | 0                   | 0             | 0 |
| 12   | Chordata | Mammalia | Rodentia       | Peromyscus       |                      | 15   | 28    | 99  |        |           |          | 8             | 0             | 0                   | 0             | 1 |
| 36   | Chordata | Mammalia | Rodentia       | Peromyscus       |                      | 29   | 39    |     | 100    |           |          | 5             | 0             | 0                   | 0             | 1 |
| 125  | Chordata | Mammalia | Rodentia       | Peromyscus       |                      | 19   | 13    | 100 | 100    |           |          | 4             | 0             | 1                   | 0             | 0 |
| 126  | Chordata | Mammalia | Rodentia       | Peromyscus       |                      | 13   | 19    |     | 98     |           |          | 4             | 0             | 1                   | 0             | 0 |
| 56   | Chordata | Mammalia | Rodentia       | Petaurista       |                      | 21   | 124   | 100 | 94     |           |          | 5             | 1             | 0                   | 0             | 0 |
| 108  | Chordata | Mammalia | Rodentia       | Phodopus         |                      | 6    | 15    | 100 | 100    | 100       |          | 3             | 1             | 0                   | 0             | 0 |
| 150  | Chordata | Mammalia | Rodentia       | Praomys          |                      | 51   | 63    | 100 | 53     | 97        |          | 3             | 0             | 0                   | 1             | 0 |
| 64   | Chordata | Mammalia | Rodentia       | Rattus           |                      | 23   | 36    | 100 | 62     | 91        |          | 4             | 0             | 1                   | 0             | 0 |
| 12   | Chordata | Mammalia | Rodentia       | Reithrodontomys  |                      | 15   | 28    | 100 | 100    |           |          | 3             | 1             | 0                   | 0             | 0 |
| 56   | Chordata | Mammalia | Rodentia       | Sciurus          |                      | 21   | 124   | 100 | 92     |           |          | 7             | 0             | 1                   | 0             | 0 |
| 149  | Chordata | Mammalia | Rodentia       | Sciurus          |                      | 21   | 34    | 100 | 100    | 100       |          | 3             | 0             | 1                   | 0             | 0 |
| 56   | Chordata | Mammalia | Rodentia       | Spermophilus     |                      | 21   | 124   | 100 | 82     |           |          | 37            | 0             | 0                   | 1             | 0 |
| 119  | Chordata | Mammalia | Rodentia       | Spermophilus     |                      | 3    | 36    |     | 100    |           |          | 4             | 0             | 1                   | 0             | 0 |
| 119  | Chordata | Mammalia | Rodentia       | Tamias           |                      | 3    | 36    |     | 73     |           |          | 23            | 1             | 0                   | 0             | 0 |
| 149  | Chordata | Mammalia | Rodentia       | Tamias           |                      | 21   | 34    | 100 | 100    | 100       |          | 3             | 1             | 0                   | 0             | 0 |
| 56   | Chordata | Mammalia | Rodentia       | Tamiasciurus     |                      | 21   | 124   | 100 | 100    |           |          | 3             | 1             | 0                   | 0             | 0 |
| 18   | Chordata | Mammalia | Rodentia       | Tatera           |                      | 11   | 28    | 1   | 72     | 58        |          | 5             | 0             | 0                   | 0             | 1 |
| 18   | Chordata | Mammalia | Rodentia       | Taterillus       |                      | 11   | 28    | >95 | >90    | >90       |          | 4             | 1             | 0                   | 0             | 0 |
| 142  | Chordata | Mammalia | Rodentia       | Thomomys         |                      | 5    | 10    |     | 84     |           |          | 6             | 1             | 0                   | 0             | 0 |
| 180  | Chordata | Mammalia | Rodentia       | Trinomys         |                      | 18   | 35    |     |        | 100       |          | 8             | 1             | 0                   | 0             | 0 |
| 10   | Chordata | Mammalia | Xenarthra      | Bradypus         |                      | 6    | 8     | 100 | 100    | 99        |          | 3             | 1             | 0                   | 0             | 0 |
| 50   | Mollusca | Bivalvia | Anomalodesmata | Lyonsia          | M                    | 21   | 32    | 99  | 80     |           |          | 3             | 0             | 0                   | 0             | 1 |
| 89   | Mollusca | Bivalvia | Arcoidea       | Anadara          | M                    | 5    | 26    |     | 87     |           |          | 9             | 1             | 0                   | 0             | 0 |
| 89   | Mollusca | Bivalvia | Arcoidea       | Barbatia(Acar)   | M                    | 5    | 26    |     | 99     |           |          | 3             | 1             | 0                   | 0             | 0 |





| Ref. | Phylum   | Class      | Clade             | Genus           | Marine (M)/nonmarine (NM) |       |     |        | # species in genus | Uni-phyletic | Multi-phyletic | Poly-phyletic |        |   |   |
|------|----------|------------|-------------------|-----------------|---------------------------|-------|-----|--------|--------------------|--------------|----------------|---------------|--------|---|---|
|      |          |            |                   |                 | ngen                      | ntaxa | MC3 | MPBoot |                    |              |                |               | MLBoot |   |   |
| 100  | Mollusca | Gastropoda | Cypraeidae        | Pseudozonaria   | M                         | 64    | 221 |        | 81                 | 4            | 1              | 0             | 0      | 0 |   |
| 100  | Mollusca | Gastropoda | Cypraeidae        | Purpuradusta    | M                         | 64    | 221 |        | 94                 | 7            | 1              | 0             | 0      | 0 |   |
| 100  | Mollusca | Gastropoda | Cypraeidae        | Pustularia      | M                         | 64    | 221 |        | 97                 | 5            | 1              | 0             | 0      | 0 |   |
| 100  | Mollusca | Gastropoda | Cypraeidae        | Staphylaea      | M                         | 64    | 221 |        | 85                 | 3            | 1              | 0             | 0      | 0 |   |
| 100  | Mollusca | Gastropoda | Cypraeidae        | Talostolida     | M                         | 64    | 221 |        | 97                 | 4            | 1              | 0             | 0      | 0 |   |
| 100  | Mollusca | Gastropoda | Cypraeidae        | Umbilia         | M                         | 64    | 221 |        | 100                | 4            | 1              | 0             | 0      | 0 |   |
| 100  | Mollusca | Gastropoda | Cypraeidae        | Zoila           | M                         | 64    | 221 |        | 99                 | 7            | 1              | 0             | 0      | 0 |   |
| 100  | Mollusca | Gastropoda | Cypraeidae        | Zonaria         | M                         | 64    | 221 |        | 95                 | 5            | 1              | 0             | 0      | 0 |   |
| 148  | Mollusca | Gastropoda | Helicidae         | Candidula       | NM                        | 26    | 37  | 95     |                    | 4            | 0              | 1             | 0      | 0 |   |
| 148  | Mollusca | Gastropoda | Helicidae         | Trochoidea      | NM                        | 26    | 37  | 95     |                    | 77           | 5              | 1             | 0      | 0 |   |
| 88   | Mollusca | Gastropoda | Helicoidea        | Cerunella       | NM                        | 30    | 42  |        | 86                 | 3            | 0              | 1             | 0      | 0 |   |
| 118  | Mollusca | Gastropoda | Hydrobiidae       | Austropyrgus    | NM                        | 11    | 30  |        | 100                | 8            | 0              | 1             | 0      | 0 |   |
| 118  | Mollusca | Gastropoda | Hydrobiidae       | Jardinella      | NM                        | 11    | 30  | 100    |                    | 87           | 11             | 1             | 0      | 0 |   |
| 48   | Mollusca | Gastropoda | Hydrobiidae       | Leptopyrgus     | NM                        | 12    | 27  | 100    |                    | 3            | 1              | 0             | 0      | 0 |   |
| 86   | Mollusca | Gastropoda | Hydrobiidae       | Marstonia       | NM                        | 5     | 70  | 97     |                    | 3            | 1              | 0             | 0      | 0 |   |
| 48   | Mollusca | Gastropoda | Hydrobiidae       | Opacuincola     | NM                        | 12    | 27  | 100    |                    | 7            | 1              | 0             | 0      | 0 |   |
| 48   | Mollusca | Gastropoda | Hydrobiidae       | Potamopyrgus    | NM                        | 12    | 27  | 100    |                    | 4            | 1              | 0             | 0      | 0 |   |
| 48   | Mollusca | Gastropoda | Hydrobiidae       | Sororipyrgus    | NM                        | 12    | 27  | 100    |                    | 3            | 1              | 0             | 0      | 0 |   |
| 163  | Mollusca | Gastropoda | Littorinidae      | Afrolittorina   | M                         | 11    | 36  | 100    |                    | 4            | 1              | 0             | 0      | 0 |   |
| 163  | Mollusca | Gastropoda | Littorinidae      | Austrolittorina | M                         | 11    | 36  | 99     |                    | 5            | 1              | 0             | 0      | 0 |   |
| 163  | Mollusca | Gastropoda | Littorinidae      | Echinolittorina | M                         | 11    | 36  | 100    |                    | 7            | 1              | 0             | 0      | 0 |   |
| 163  | Mollusca | Gastropoda | Littorinidae      | Littoraria      | M                         | 11    | 36  | 100    |                    | 4            | 1              | 0             | 0      | 0 |   |
| 90   | Mollusca | Gastropoda | Muricidae         | Nucella         | M                         | 7     | 15  |        |                    | 88           | 5              | 0             | 0      | 1 |   |
| 113  | Mollusca | Gastropoda | Muricoidea        | Coralliophila   | M                         | 3     | 7   |        | 87                 | 95           | 5              | 0             | 0      | 1 |   |
| 159  | Mollusca | Gastropoda | Nudibranchia      | Aplysia         | M                         | 27    | 38  |        | 100                | 5            | 1              | 0             | 0      | 0 |   |
| 168  | Mollusca | Gastropoda | Nudibranchia      | Aplysia         | M                         | 42    | 52  |        | 99                 | 3            | 1              | 0             | 0      | 0 |   |
| 167  | Mollusca | Gastropoda | Nudibranchia      | Cadlina         | M                         | 2     | 24  | 100    | 100                | 3            | 1              | 0             | 0      | 0 |   |
| 169  | Mollusca | Gastropoda | Nudibranchia      | Chromodoris     | M                         | 13    | 17  |        | 74                 | 3            | 1              | 0             | 0      | 0 |   |
| 156  | Mollusca | Gastropoda | Nudibranchia      | Dendrodois      | M                         | 8     | 21  |        | 73                 | 4            | 1              | 0             | 0      | 0 |   |
| 156  | Mollusca | Gastropoda | Nudibranchia      | Doriopsilla     | M                         | 8     | 21  |        | 83                 | 4            | 1              | 0             | 0      | 0 |   |
| 159  | Mollusca | Gastropoda | Nudibranchia      | Doto            | M                         | 27    | 38  |        | 100                | 3            | 1              | 0             | 0      | 0 |   |
| 156  | Mollusca | Gastropoda | Nudibranchia      | Phyllidopsis    | M                         | 8     | 21  |        | 87                 | 3            | 0              | 0             | 0      | 1 |   |
| 72   | Mollusca | Gastropoda | Pachychilidae     | Brotia          | NM                        | 9     | 45  | 100    | 78                 | 19           | 0              | 0             | 0      | 1 |   |
| 72   | Mollusca | Gastropoda | Pachychilidae     | Pachychilus     | NM                        | 9     | 45  | 96     | 100                | 3            | 1              | 0             | 0      | 0 |   |
| 72   | Mollusca | Gastropoda | Pachychilidae     | Paracrostoma    | NM                        | 9     | 45  | 100    | 100                | 3            | 1              | 0             | 0      | 0 |   |
| 46   | Mollusca | Gastropoda | Pachychilidae     | Tylomelania     | NM                        | 4     | 12  |        | 100                | 7            | 1              | 0             | 0      | 0 |   |
| 72   | Mollusca | Gastropoda | Pachychilidae     | Tylomelania     | NM                        | 9     | 45  | 100    | 100                | 13           | 1              | 0             | 0      | 0 |   |
| 74   | Mollusca | Gastropoda | Patellidae        | Cellana         | M                         | 5     | 38  |        | 97                 | 5            | 1              | 0             | 0      | 0 |   |
| 74   | Mollusca | Gastropoda | Patellidae        | Cymbula         | M                         | 5     | 38  |        | 96                 | 6            | 1              | 0             | 0      | 0 |   |
| 74   | Mollusca | Gastropoda | Patellidae        | Helcion         | M                         | 5     | 38  |        | 73                 | 3            | 1              | 0             | 0      | 0 |   |
| 74   | Mollusca | Gastropoda | Patellidae        | Patella         | M                         | 5     | 38  |        | 100                | 9            | 1              | 0             | 0      | 0 |   |
| 74   | Mollusca | Gastropoda | Patellidae        | Scutellastra    | M                         | 5     | 38  |        | 85                 | 13           | 0              | 1             | 0      | 0 |   |
| 107  | Mollusca | Gastropoda | Patellogastropoda | Cellana         | M                         | 26    | 135 | 94     | 100                | 18           | 1              | 0             | 0      | 0 |   |
| 107  | Mollusca | Gastropoda | Patellogastropoda | Cymbula         | M                         | 26    | 135 | 100    | 100                | 4            | 1              | 0             | 0      | 0 |   |
| 107  | Mollusca | Gastropoda | Patellogastropoda | Eoacmaea        | M                         | 26    | 135 | 100    | 100                | 8            | 1              | 0             | 0      | 0 |   |
| 107  | Mollusca | Gastropoda | Patellogastropoda | Helcion         | M                         | 26    | 135 | 100    | 98                 | 3            | 1              | 0             | 0      | 0 |   |
| 107  | Mollusca | Gastropoda | Patellogastropoda | Lottia          | M                         | 26    | 135 | 100    | 81                 | 24           | 0              | 0             | 0      | 1 |   |
| 107  | Mollusca | Gastropoda | Patellogastropoda | Nacella         | M                         | 26    | 135 | 100    | 100                | 3            | 1              | 0             | 0      | 0 |   |
| 107  | Mollusca | Gastropoda | Patellogastropoda | Nipponoacmaea   | M                         | 26    | 135 | 100    | 99                 | 8            | 1              | 0             | 0      | 0 |   |
| 107  | Mollusca | Gastropoda | Patellogastropoda | Notoacmaea      | M                         | 26    | 135 | 100    | 76                 | 9            | 1              | 0             | 0      | 0 |   |
| 107  | Mollusca | Gastropoda | Patellogastropoda | Patella         | M                         | 26    | 135 | 100    | 100                | 4            | 1              | 0             | 0      | 0 |   |
| 107  | Mollusca | Gastropoda | Patellogastropoda | Patelloida      | M                         | 26    | 135 | 100    | 99                 | 19           | 1              | 0             | 0      | 0 |   |
| 107  | Mollusca | Gastropoda | Patellogastropoda | Scurria         | M                         | 26    | 135 | 100    | 84                 | 10           | 1              | 0             | 0      | 0 |   |
| 107  | Mollusca | Gastropoda | Patellogastropoda | Scutellastra    | M                         | 26    | 135 | 100    | 99                 | 7            | 0              | 1             | 0      | 0 |   |
| 105  | Mollusca | Gastropoda | Planorbidae       | Biomphalaria    | NM                        | 17    | 40  |        | 1                  | >75          | 8              | 1             | 0      | 0 | 0 |
| 105  | Mollusca | Gastropoda | Planorbidae       | Bulinus         | NM                        | 17    | 40  |        | 1                  | >75          | 7              | 1             | 0      | 0 | 0 |
| 105  | Mollusca | Gastropoda | Planorbidae       | Drepanotrema    | NM                        | 17    | 40  |        | >75                | >75          | 5              | 1             | 0      | 0 | 0 |
| 105  | Mollusca | Gastropoda | Planorbidae       | Gyraulus        | NM                        | 17    | 40  |        | >75                | >75          | 3              | 1             | 0      | 0 | 0 |
| 105  | Mollusca | Gastropoda | Planorbidae       | Helisoma        | NM                        | 17    | 40  |        | >75                | >75          | 3              | 1             | 0      | 0 | 0 |
| 58   | Mollusca | Gastropoda | Pleuroceridae     | Juga            | NM                        | 6     | 31  |        | 100                | 3            | 1              | 0             | 0      | 0 |   |
| 58   | Mollusca | Gastropoda | Pleuroceridae     | Leptoxis        | NM                        | 6     | 31  |        | 100                | 7            | 0              | 0             | 1      | 0 |   |
| 58   | Mollusca | Gastropoda | Pleuroceridae     | Lithasia        | NM                        | 6     | 31  |        | 100                | 4            | 0              | 0             | 0      | 1 |   |
| 103  | Mollusca | Gastropoda | Pleuroceridae     | Lithasia        | NM                        | 5     | 12  |        | 100                | 8            | 0              | 0             | 1      | 0 |   |
| 58   | Mollusca | Gastropoda | Pleuroceridae     | Pleurocera      | NM                        | 6     | 31  |        | 78                 | 8            | 1              | 0             | 0      | 0 |   |
| 127  | Mollusca | Gastropoda | Potamididae       | Cerithideopsis  | M                         | 14    | 28  | 100    |                    | 5            | 0              | 1             | 0      | 0 |   |
| 127  | Mollusca | Gastropoda | Potamididae       | Cerithideopsis  | M                         | 14    | 28  | 100    |                    | 3            | 1              | 0             | 0      | 0 |   |
| 127  | Mollusca | Gastropoda | Potamididae       | Terebralia      | M                         | 14    | 28  | 100    |                    | 3            | 1              | 0             | 0      | 0 |   |
| 25   | Mollusca | Gastropoda | Pulmonata         | Albinaria       | NM                        | 17    | 41  |        | 70                 | 3            | 1              | 0             | 0      | 0 |   |
| 178  | Mollusca | Gastropoda | Pulmonata         | Albinaria       | NM                        | 5     | 46  |        | 100                | 6            | 1              | 0             | 0      | 0 |   |
| 25   | Mollusca | Gastropoda | Pulmonata         | Carinigera      | NM                        | 17    | 41  |        | 73                 | 10           | 0              | 0             | 0      | 1 |   |
| 178  | Mollusca | Gastropoda | Pulmonata         | Carinigera      | NM                        | 5     | 46  | 54     |                    | 10           | 0              | 0             | 0      | 1 |   |
| 134  | Mollusca | Gastropoda | Pulmonata         | Catinella       | NM                        | 2     | 19  |        | 90                 | 80           | 3              | 0             | 0      | 1 |   |
| 178  | Mollusca | Gastropoda | Pulmonata         | Cristataria     | NM                        | 5     | 46  | 100    |                    | 4            | 1              | 0             | 0      | 0 |   |
| 25   | Mollusca | Gastropoda | Pulmonata         | Isabellaria     | NM                        | 17    | 41  | 83     | 35                 | 8            | 0              | 0             | 0      | 1 |   |
| 178  | Mollusca | Gastropoda | Pulmonata         | Isabellaria     | NM                        | 5     | 46  | 78     |                    | 14           | 0              | 0             | 0      | 1 |   |
| 168  | Mollusca | Gastropoda | Pulmonata         | Lymnaea         | NM                        | 42    | 52  |        | 100                | 4            | 0              | 0             | 0      | 1 |   |
| 34   | Mollusca | Gastropoda | Pulmonata         | Lymnaea         | NM                        | 16    | 19  |        | 52                 | 3            | 0              | 0             | 0      | 1 |   |
| 47   | Mollusca | Gastropoda | Pulmonata         | Partula         | NM                        | 2     | 15  |        |                    | 80           | 10             | 1             | 0      | 0 |   |



**Table S2. Counts and percentages of monophyletic, paraphyletic, and polyphyletic taxa for bivalve and gastropod mollusks, and marine and nonmarine partitions within each**

| Taxa                   | Bivalvia  |             |        | Bivalves: marine |             |        | Bivalves: nonmarine |             |             | Gastropoda |             |        | Gastropoda: marine |             |        | Gastropoda: nonmarine |             |        |
|------------------------|-----------|-------------|--------|------------------|-------------|--------|---------------------|-------------|-------------|------------|-------------|--------|--------------------|-------------|--------|-----------------------|-------------|--------|
|                        | # genera  | %           | 2SE, % | # genera         | %           | 2SE, % | # genera            | %           | 2SE, %      | # genera   | %           | 2SE, % | # genera           | %           | 2SE, % | # genera              | %           | 2SE, % |
| Monophyletic           | 20        | 39.2        | 13.2   | 13               | 41.9        | 16.7   | 7                   | <b>35.0</b> | <b>19.8</b> | 98         | 71.0        | 7.7    | 71                 | 78.0        | 8.7    | 27                    | 57.4        | 13.9   |
| <i>Nonmonophyletic</i> | <i>31</i> | <i>60.8</i> |        | <i>18</i>        | <i>58.1</i> |        | <i>13</i>           | <i>65.0</i> |             | <i>40</i>  | <i>29.0</i> |        | <i>20</i>          | <i>22.0</i> |        | <i>20</i>             | <i>42.6</i> |        |
| Uniparaphyletic        | 5         | 9.8         |        | 4                | 12.9        |        | 1                   | 5.0         |             | 8          | 5.8         |        | 5                  | 5.5         |        | 3                     | 6.4         |        |
| Multiparaphyletic      | 3         | 5.9         |        | 1                | 3.2         |        | 2                   | 10.0        |             | 7          | 5.1         |        | 3                  | 3.3         |        | 4                     | 8.5         |        |
| <i>Nonpolyphyletic</i> | <i>28</i> | <i>54.9</i> |        | <i>18</i>        | <i>58.1</i> |        | <i>10</i>           | <i>50.0</i> |             | <i>113</i> | <i>81.9</i> |        | <i>79</i>          | <i>86.8</i> |        | <i>34</i>             | <i>72.3</i> |        |
| Polyphyletic           | 23        | 45.1        | 13.4   | 13               | 41.9        | 16.7   | 10                  | 50.0        | 20.4        | 25         | 18.1        | 6.6    | 12                 | 13.2        | 7.3    | 13                    | 27.7        | 12.8   |
| Total                  | 51        |             |        | 31               |             |        | 20                  |             |             | 138        |             |        | 91                 |             |        | 47                    |             |        |

Two SE of the observed percentages are given for the rate of monophyly and polyphyly. Rows in italics are the complementary counts and percentages to the cases of monophyly and paraphyly. All of the monophyly values are significantly greater than expected by chance under our first 2 models. Nonmarine bivalves possess a rate of monophyly that is not significantly >25% (bold). This is the sole partition where this expected rate is not significantly exceeded.

**Table S3. Size and range data for paraphyletic and polyphyletic morphogenera**

| Body mass or size    |        |                   |                   | Total latitudinal range: degrees latitude |        |                   |                   |
|----------------------|--------|-------------------|-------------------|-------------------------------------------|--------|-------------------|-------------------|
| Genus                | Status | Morphogenus value | Total group value | Genus                                     | Status | Morphogenus value | Total group value |
| <b>Mammalia</b>      |        |                   |                   |                                           |        |                   |                   |
| <i>Suncus</i>        | Poly   | 1.43              | 2.18              | <i>Suncus</i>                             | Poly   | 67.05             | 75.60             |
| <i>Mustela</i>       | Poly   | 6.59              | 6.85              | <i>Sylvisorex</i>                         | Poly   | 29.07             | 75.60             |
| <i>Martes</i>        | Poly   | 7.82              | 8.27              | <i>Mustela</i>                            | Poly   | 47.32             | 47.32             |
| <i>Felis</i>         | Poly   | 9.38              | 10.76             | <i>Martes</i>                             | Poly   | 103.50            | 116.74            |
| <i>Phoca</i>         | Poly   | 11.51             | 11.70             | <i>Felis</i>                              | Poly   | 114.01            | 114.01            |
| <i>Herpestes</i>     | Poly   | 7.19              | 7.19              | <i>Herpestes</i>                          | Poly   | 61.76             | 77.57             |
| <i>Arctocephalus</i> | Poly   | 11.47             | 11.49             | <i>Mesoplodon</i>                         | Poly   | 66.10             | 126.11            |
| <i>Mesoplodon</i>    | Poly   | 15.04             | 15.38             | <i>Bos</i>                                | Poly   | 102.73            | 102.73            |
| <i>Bos</i>           | Poly   | 13.59             | 13.46             | <i>Tragelaphas</i>                        | Poly   | 37.82             | 46.83             |
| <i>Tragelaphas</i>   | Poly   | 11.31             | 11.82             | <i>Cervus</i>                             | Poly   | 31.73             | 99.43             |
| <i>Cervus</i>        | Poly   | 11.20             | 11.47             | <i>Cebus</i>                              | Poly   | 31.49             | 31.49             |
| <i>Cebus</i>         | Poly   | 7.87              | 7.89              | <i>Cecopithecus</i>                       | Poly   | 33.52             | 42.17             |
| <i>Cercopithecus</i> | Poly   | 8.48              | 8.47              | <i>Peromyscus</i>                         | Poly   | 50.12             | 50.12             |
| <i>Peromyscus</i>    | Poly   | 3.33              | 3.69              | <i>Tatera</i>                             | Poly   | 69.68             | 69.68             |
| <i>Tatera</i>        | Poly   | 4.60              | 4.11              | <i>Clethrionomys</i>                      | Poly   | 39.29             | 50.66             |
| <i>Clethrionomys</i> | Poly   | 3.05              | 3.21              | <i>Eothenomys</i>                         | Poly   | 19.49             | 50.66             |
| <i>Mus</i>           | Poly   | 2.56              | 3.49              | <i>Calomys</i>                            | Poly   | 50.16             | 96.06             |
| <i>Calomys</i>       | Poly   | 3.00              | 3.65              | <i>Spermophilus</i>                       | Poly   | 53.64             | 53.64             |
| <i>Peromyscus</i>    | Poly   | 3.06              | 3.16              | <i>Mastomys</i>                           | Poly   | 6.95              | 18.92             |
| <i>Spermophilus</i>  | Poly   | 5.64              | 5.95              | <i>Myomys</i>                             | Poly   | 16.65             | 18.92             |
| <i>Myomys</i>        | Poly   | 3.58              | 3.69              | <i>Praomys</i>                            | Poly   | 18.36             | 30.73             |
| <i>Orzomys</i>       | Poly   | 4.10              | 4.08              | <i>Orzomys</i>                            | Poly   | 112.77            | 112.77            |
| <i>Crocidura</i>     | Para   | 2.28              | 2.38              | <i>Crocidura</i>                          | Para   | 56.66             | 57.32             |
| <i>Vulpes</i>        | Para   | 8.19              | 8.45              | <i>Vulpes</i>                             | Para   | 107.34            | 113.33            |
| <i>Panthera</i>      | Para   | 11.99             | 11.34             | <i>Panthera</i>                           | Para   | 59.27             | 59.27             |
| <i>Martes</i>        | Para   | 7.16              | 7.25              | <i>Martes</i>                             | Para   | 67.85             | 80.14             |
| <i>Ursus</i>         | Para   | 11.87             | 11.51             | <i>Ursus</i>                              | Para   | 68.60             | 85.07             |
| <i>Cervus</i>        | Para   | 11.87             | 11.91             | <i>Capra</i>                              | Para   | 20.88             | 24.44             |
| <i>Capra</i>         | Para   | 11.28             | 10.95             | <i>Gazella</i>                            | Para   | 48.82             | 48.82             |
| <i>Gazella</i>       | Para   | 10.25             | 10.38             | <i>Tragelaphas</i>                        | Para   | 37.82             | 46.83             |
| <i>Tragelaphas</i>   | Para   | 11.34             | 11.37             | <i>Bos</i>                                | Para   | 102.73            | 102.73            |
| <i>Bos</i>           | Para   | 13.46             | 13.36             | <i>Marmosa</i>                            | Para   | 47.05             | 52.10             |
| <i>Sminthopsis</i>   | Para   | 2.93              | 2.86              | <i>Cecopithecus</i>                       | Para   | 33.52             | 37.57             |
| <i>Marmosa</i>       | Para   | 3.25              | 3.57              | <i>Aconaemys</i>                          | Para   | 8.49              | 14.56             |
| <i>Macropus</i>      | Para   | 9.73              | 9.67              | <i>Sciurus</i>                            | Para   | 76.40             | 76.40             |
| <i>Callithrix</i>    | Para   | 5.83              | 5.83              | <i>Praomys</i>                            | Para   | 17.19             | 17.19             |
| <i>Cecopithecus</i>  | Para   | 8.34              | 8.39              | <i>Spermophilus</i>                       | Para   | 29.20             | 38.54             |
| <i>Aconaemys</i>     | Para   | 4.73              | 4.85              |                                           |        |                   |                   |
| <i>Sciurus</i>       | Para   | 6.08              | 5.66              |                                           |        |                   |                   |
| <i>Praomys</i>       | Para   | 3.60              | 3.52              |                                           |        |                   |                   |
| <i>Spermophilus</i>  | Para   | 5.63              | 6.90              |                                           |        |                   |                   |
| <i>Peromyscus</i>    | Para   | 3.33              | 3.33              |                                           |        |                   |                   |
| <i>Hapalemur</i>     | Para   | 7.36              | 7.56              |                                           |        |                   |                   |
| <i>Hylopetes</i>     | Para   | 5.42              | 5.11              |                                           |        |                   |                   |
| <i>Tupia</i>         | Para   | 5.10              | 5.14              |                                           |        |                   |                   |
| <b>Mollusca</b>      |        |                   |                   |                                           |        |                   |                   |
| <i>Venus</i>         | Poly   | 3.87              | 3.86              | <i>Venus</i>                              | Poly   | 88.00             | 102.00            |
| <i>Circe</i>         | Poly   | 3.94              | 3.67              | <i>Circe</i>                              | Poly   | 69.00             | 69.00             |
| <i>Paphia</i>        | Poly   | 3.95              | 3.79              | <i>Paphia</i>                             | Poly   | 79.00             | 107.00            |
| <i>Ruditapes</i>     | Poly   | 3.89              | 3.79              | <i>Ruditapes</i>                          | Poly   | 39.00             | 113.00            |
| <i>Lyonsia</i>       | Poly   | 2.43              | 2.79              | <i>Lyonsia</i>                            | Poly   | 143.00            | 143.00            |
| <i>Tricornis</i>     | Poly   | 5.27              | 4.73              | <i>Tricornis</i>                          | Poly   | 58.00             | 69.00             |
| <i>Coralliophila</i> | Poly   | 3.69              | 3.69              | <i>Coralliophila</i>                      | Poly   | 67.00             | 67.00             |
| <i>Ectenagena</i>    | Poly   | 4.19              | 4.11              | <i>Ectenagena</i>                         | Poly   | 41.00             | 66.00             |
| <i>Vesicomya</i>     | Poly   | 3.88              | 4.05              | <i>Vesicomya</i>                          | Poly   | 54.00             | 66.00             |
| <i>Calyptogena</i>   | Poly   | 4.11              | 4.16              | <i>Calyptogena</i>                        | Poly   | 51.00             | 66.00             |
| <i>Ostrea</i>        | Poly   | 4.40              | 4.49              | <i>Ostrea</i>                             | Poly   | 108.50            | 108.50            |
| <i>Bathymodiolus</i> | Poly   | 4.46              | 4.46              | <i>Bathymodiolus</i>                      | Poly   | 79.00             | 79.00             |
| <i>Anodontia</i>     | Poly   | 3.45              | 3.26              | <i>Anodontia</i>                          | Poly   | 70.00             | 78.00             |
| <i>Globivenus</i>    | Para   | 3.50              | 3.56              | <i>Globivenus</i>                         | Para   | 67.00             | 67.00             |
| <i>Canarium</i>      | Para   | 3.75              | 3.85              | <i>Canarium</i>                           | Para   | 67.00             | 74.00             |
| <i>Contradusta</i>   | Para   | 3.38              | 3.11              | <i>Contradusta</i>                        | Para   | 60.00             | 64.00             |
| <i>Scutellastra</i>  | Para   | 4.01              | 4.01              | <i>Scutellastra</i>                       | Para   | 70.00             | 70.00             |
| <i>Spisula</i>       | Para   | 3.91              | 3.61              | <i>Spisula</i>                            | Para   | 55.00             | 55.00             |
| <i>Cuspidaria</i>    | Para   | 3.46              | 3.22              | <i>Cuspidaria</i>                         | Para   | 146.00            | 146.00            |

Median body mass [ln(kg)] and total latitudinal range (degrees) are given for mammalian morphogenera. Body size (maximum shell dimension in gastropods, geometric mean of length and height in bivalves) and total latitudinal range (degrees) are given for molluscan morphogenera.

**Table S4. Summary of morphogenera that were duplicated across phylogenetic analyses**

|                                        | Monophyletic | Uniparaphyletic | Multiparaphyletic | Polyphyletic |
|----------------------------------------|--------------|-----------------|-------------------|--------------|
| Mammalia (Total duplicated genera: 51) |              |                 |                   |              |
| Monophyletic                           | <b>29</b>    | –               | –                 | –            |
| Uniparaphyletic                        | 4            | <b>2</b>        | –                 | –            |
| Multiparaphyletic                      | 1            | 2               | <b>0</b>          | –            |
| Polyphyletic                           | 3            | 6               | 1                 | <b>1</b>     |
| Mollusca (Total duplicated genera: 26) |              |                 |                   |              |
| Monophyletic                           | <b>12</b>    | –               | –                 | –            |
| Uniparaphyletic                        | 0            | <b>2</b>        | –                 | –            |
| Multiparaphyletic                      | 1            | 1               | <b>0</b>          | –            |
| Polyphyletic                           | 0            | 1               | 1                 | <b>8</b>     |

Shown are genera that occur in only 1 phyletic state across all analyses (bold) or across two states. Two mammalian genera are observed in 3 states: *Balaenoptera* (monophyletic, uniparaphyletic, and polyphyletic) and *Tragelephas* (monophyletic, uniparaphyletic, and multiparaphyletic). No molluscan genera are observed in 3 states.
